# Supplementary material for: A machine learning approach to integrate big data for precision medicine in acute myeloid leukemia
Source: PubMed Central journal article supplement (PMC5752671; doi:10.1038/s41467-017-02465-5), 2018-01-03
Supplement: 41467_2017_2465_MOESM1_ESM.pdf [file 41467_2017_2465_MOESM1_ESM.pdf]

1 **Supplementary Information**

2  
3

4 **Supplementary Notes**

5

6 **Supplementary Note 1: mRNA expression profiles**

7 For all of the 30 samples, gene expression was analyzed using Affymetrix Human U133 Plus 2.0 arrays.  
8 The analysis was performed at the Department of Environmental and Occupational Health Science's  
9 Functional Genomics Core Laboratory at the University of Washington. RNA was isolated using the  
10 Qiagen RNeasy Mini kit (Qiagen Inc, Germantown MD). RNA quantity was assessed by measuring  
11  $OD_{260}$ , and purity by  $OD_{260/280}$  and  $OD_{260/230}$  ratios with the NanoDrop spectrophotometer (Thermo  
12 Fisher Scientific Inc, Wilmington, DE). RNA integrity was assessed using the Agilent 2100 Bioanalyzer  
13 (Agilent Technologies Inc., Santa Clara, CA). RNA samples were required to meet these stringent  
14 quality control parameters and were then processed according to the manufacturer's  
15 recommendations. Briefly, 250 ng of total RNA was reverse transcribed. The resulting cDNA was  
16 converted to biotinylated cRNA. The biotinylated fragments were hybridized to Affymetrix U133 Plus  
17 2.0 arrays, washed and stained. The arrays were scanned with an Affymetrix GeneChip® 3000 scanner.  
18 Image generation and feature extraction were performed using Affymetrix GeneChip Command  
19 Console software.

20 For the additional test set of 12 patient samples (from which we show the results in **Fig. 3b**), RNA-seq  
21 data generation was performed at the Northwest Clinical Genomics Laboratory, UW Medicine Center  
22 for Precision Diagnostics using the TruSeq® stranded mRNA kit from Illumina (San Diego, CA)  
23 according to manufacturer's instructions. We had two RNA-seq replicates for each of the 12 samples.  
24 For MERGE experiments, we averaged the FPKM (Fragments Per Kilobase of transcript per Million  
25 mapped reads) values from the Cufflinks<sup>1</sup> output from the two replicates of each sample.

26 Gene expression for the 14 AML cell lines (EOL-1, MOLM/16, NB4, OCI-AML3, SKM1, HL60, KG1,  
27 MOLM/13, MV4.11, OCI-AML2, PL-21, U937, KASUMI1, THP-1) was retrieved from the Cancer Cell  
28 Line Encyclopedia (CCLE)<sup>2</sup>.

29

30 **Supplementary Note 2: Curve fitting to estimate drug sensitivity profiles**

31 As was done in CCLE study<sup>2</sup>, from each dose-response data for a combination of a drug and a patient  
32 sample, we extracted summary statistics, including area under the curve (AUC), half maximal  
33 inhibitory concentration ( $IC_{50}$ ), half maximal effective concentration ( $EC_{50}$ ), and maximal effect level  
34 ( $A_{max}$ ). In brief, we fitted the dose-response data (averaged over duplicates) to the following 4  
35 parameter sigmoid model:

$$y = A_{\text{inf}} + \left( \frac{A_0 - A_{\text{inf}}}{1 + \left( \frac{x}{\text{EC}_{50}} \right)^{\text{Hill}}} \right)$$

Here,  $A_0$  and  $A_{\text{inf}}$  are the top and bottom asymptotes of the response (cell viability);  $\text{EC}_{50}$  is the inflection point of the curve; and Hill is the Hill slope, which describes the curve's steepness. Other key parameters derived from the models include  $\text{IC}_{50}$  (the concentration where the fitted curve crosses 50% in cell viability) and  $A_{\text{max}}$  (the maximal activity value reached within a model). We extracted these parameters (AUC,  $\text{IC}_{50}$ ,  $\text{EC}_{50}$ , and  $A_{\text{max}}$ ) after curve fitting by using MATLAB's 'nlinfit' function for nonlinear curve fitting. For inactive compounds, it is impossible to derive an  $\text{IC}_{50}$ ; in this instance, as was done in the CCLE study<sup>2</sup>, we simply used the maximum tested concentration as the default value – which serves primarily as a placeholder to allow algorithms to work on all samples. Batch effects were corrected using ComBat<sup>3</sup> for each drug sensitivity summary based on the three batches of experiments for the 30 patients.

From these statistics, we chose AUC because it represents an average of drug sensitivity across a range of drug concentrations. Indeed, AUC showed by far the strongest association with gene expression levels; the number of significant associations (FDR corrected  $p$ -value < 0.1) between a gene and a drug sensitivity measure was 53,967 for AUC, 23,641 for  $\text{IC}_{50}$ , 15,112 for  $\text{EC}_{50}$ , and 7,132 for  $A_{\text{max}}$ . Considering additional drug sensitivity measures would increase the total number of hypotheses.

### **Supplementary Note 3: Summary of the clinical information and its consistency with our *in vitro* drug sensitivity data**

Of the 30 AML patient samples, 24 were newly diagnosed, and 6 had relapsed. The majority of samples (19 of 30) were males. The median age was 54, and the age range was [19, 83]. Six patients had antecedent hematologic disorders. According to European LeukemiaNet criteria<sup>4</sup>, seven samples were in favorable risk group, eleven were in intermediate-1, 2 were in intermediate-2, and ten were in the adverse risk cytogenetics group. Several different regimens were used to treat the patients, most of which included cytarabine, and many of which included an anthracycline. **Supplementary Data 3** contains the detailed clinical information including usual evaluation (including risk group category and cytogenetic features), response to treatment, duration of remission, and the individual regimens for each of the samples.

We measured the standard clinical mutation status on *FLT3* and *NPM1* for most of the 30 patients (26 patients tested for *NPM1* mutation; 27 tested for *FLT3* mutation). Seven of 26 patients had an *NPM1* mutation, and seven of 27 patients had the *FLT3* ITD mutation. We observed a statistically significant association between *FLT3* mutation status and 12 drugs (FDR corrected  $p$ -value < 0.1): AS101, AT-7519, AZD7762, cladribine, mitomycin C, mitoxantrone, NVP-AUY-922, obatoclast, PIK-75, midostaurin (PKC412), sunitinib, and tandutinib. Three of these drugs (midostaurin, sunitinib and tandutinib) are known to have a *FLT3* inhibitory role. None of the drugs is associated with *NPM1* mutation status at the same significance level.

1 Additionally, we checked the statistical significance of the association between the complete remission  
2 (CR) status and the drug sensitivity measure (AUC) across all 53 drugs. Interestingly, 12 of 15 drugs  
3 (80%) (azacitidine, bortezomib, cladribine, clofarabine, daunorubicin, etoposide, fludarabine,  
4 mitoxantrone, panobinostat, PKC412, tretinoin, vorinostat) that have shown clinical efficacy in AML  
5 treatment were significantly associated with CR at FDR= 0.05, while only 21 of the other 38 drugs  
6 (55.3%) showed significant association with CR (**Table S2**). Some of the 38 drugs in the latter set have  
7 successor agents that have shown clinical efficacy in AML, such as the Bcl2 inhibitor ABT-199  
8 (venetoclax), a successor to ABT-737 and ABT-263 that we tested. Moreover, drugs might have additive  
9 or synergistic activity in combinations; however, in this study, the drugs were assayed as single agents.  
10 We note that cytarabine, commonly used to treat AML, is not listed in **Table S2** because it was not  
11 selected by the procedure that we followed to select the 53 drugs we focused on in our computational  
12 framework.

13 While cytarabine is commonly used to treat AML and a majority of the 30 AML patients received this  
14 drug, it was not one of the 53 drugs included in our MERGE computational framework: our criterion  
15 for selecting whether to include each of the 160 tested drugs in the study was exhibited activity (cell  
16 viability  $\leq 50\%$ ) of the drug against at least half of the 30 patient samples; cytarabine did not satisfy this  
17 criterion. One possible reason is that the tested concentrations were too low for the 12 patients in the  
18 first batch (concentration range  $2 \times 10^{-10}$  M to  $1 \times 10^{-6}$  M), and cytarabine did not exhibit any activity  
19 for those patients until the highest concentration point. The concentrations were then increased for the  
20 next 18 patient samples (range  $4 \times 10^{-8}$  M to  $1 \times 10^{-4}$  M). For comparison, the peak mean plasma  
21 concentration after high dose cytarabine was  $2 \times 10^{-3}$  M<sup>5</sup>.

22

#### 23 **Supplementary Note 4: Extracting driver features from publicly available sources**

24 The MERGE algorithm takes a set of *driver features* for each gene – namely, expression hubness,  
25 candidate regulators, mutation, copy number variation, and methylation – as input and estimates a  
26 MERGE score for each gene based on these features (**Fig. 1b**). These features were extracted from  
27 publicly available sources, such as TCGA (The Cancer Genome Atlas) AML study<sup>6</sup>, AML expression  
28 studies<sup>7</sup>, and gene annotation databases, as described in detail below.

29 *Expression hubness*: In our prior study, we developed a novel computational method, named SPARROW  
30 (**SPAR**se selected exp**R**essi**O**n regulators identified **W**ith penalized regression), to estimate each gene's  
31 *hubness* purely based on expression data from cancer patients. SPARROW employs a sparse statistical  
32 model in which each gene's expression level is modeled as a linear combination of a small set of other  
33 genes (i.e., sparse basis), and determines the hubness of each gene based on how often it is chosen in  
34 the sparse basis for any other gene<sup>8</sup>. To use gene hubness as a MERGE feature, we downloaded the R  
35 data object (.rda) containing the SPARROW results for AML from [http://sparrow-](http://sparrow-leelab.cs.washington.edu/data)  
36 [leelab.cs.washington.edu/data](http://sparrow-leelab.cs.washington.edu/data). We then used 'sparrow1' scores (the number of downstream genes)  
37 from the 'basesFreq' object as the expression hubness feature.

38 *Candidate regulators*: The genes known to regulate other genes are more likely disease drivers and hence  
39 more reliable molecular markers for therapeutic response than those that are not. To incorporate this

1 hypothesis, we used a list of genes known to have regulatory roles, including transcription factors,  
2 chromatin remodelers and signal transduction genes, constructed based on gene annotation databases<sup>7</sup>.  
3 Based on this list of 3,052 genes, we generated a binary feature for each gene by assigning 1 if the gene  
4 was on the list and 0 otherwise.

5 *Mutation*: We downloaded significance measures of mutation frequencies for each gene measured in  
6 the MutSig2CV Analysis of the AML study from TCGA (<http://firebrowse.org/?cohort=LAML>). Each  
7 gene was given a *p*-value that measured the statistical significance that the gene had mutated more  
8 often than expected by chance given background mutation processes across patients; we used  
9  $-\log_{10}p$ -value as the feature value.

10 *Copy number variation (CNV)*: We downloaded CNV measures ([gdac.broadinstitute.org\\_LAML-](http://gdac.broadinstitute.org_LAML-TB.CopyNumber_Gistic2.Level_4.2015082100.0.0.tar.gz)  
11 [TB.CopyNumber\\_Gistic2.Level\\_4.2015082100.0.0.tar.gz](http://gdac.broadinstitute.org_LAML-TB.CopyNumber_Gistic2.Level_4.2015082100.0.0.tar.gz)) from  
12 [http://gdac.broadinstitute.org/runs/analyses\\_\\_2015\\_08\\_21/data/LAML/20150821/](http://gdac.broadinstitute.org/runs/analyses__2015_08_21/data/LAML/20150821/). Then, we used  
13 `all_data_by_genes.txt` in this tar.gz file to assign 1 (having CNV) or 0 (no CNV) to each gene. We set the  
14 CNV feature of a gene to 1 if the gene was amplified or deleted by at least .05 in at least 20 of 191  
15 patients (~10%), and to 0 otherwise.

16 *Methylation*: We downloaded DNA methylation measures  
17 ([gdac.broadinstitute.org\\_LAML.Methylation\\_Preprocess.Level\\_3.2015110100.0.0.tar.gz](http://gdac.broadinstitute.org_LAML.Methylation_Preprocess.Level_3.2015110100.0.0.tar.gz)) from  
18 [http://gdac.broadinstitute.org/runs/stddata\\_\\_2015\\_11\\_01/data/LAML/20151101/](http://gdac.broadinstitute.org/runs/stddata__2015_11_01/data/LAML/20151101/). We then used  
19 `LAML.meth.by_mean.data.txt` in this tar.gz file to obtain the average methylation levels for each gene  
20 across all patients.

21

## 22 **Supplementary Note 5: Averaging the methylation values across the CpG probes and across the** 23 **samples**

24 The AML study from TCGA includes preprocessed methylation profiles generated by four different  
25 pipelines that retrieve the gene-based methylation values from the CpG probes. These four include: (1)  
26 using the CpG probe with the highest anticorrelation with the gene's expression level, (2) using the  
27 CpG probe with the highest anticorrelation with the clinical data, (3) using the mean signal intensities  
28 across all CpG probes in proximity to the gene, and (4) using the CpG probe with the maximum  
29 standard deviation across all beta values.

30 A specific position of methylation (e.g., whether it occurs around the transcription start site or over a  
31 gene body) offers important information to understand the epigenetic cause of variation of  
32 downstream phenotypes, such as gene expression levels. Accordingly, the data generated by the first  
33 two preceding approaches were generally chosen when the goal was to explain a phenotype of interest  
34 (i.e., gene expression or clinical data) and to choose the probe likely to represent the molecular basis for  
35 the phenotype. Since we sought to develop a general framework to utilize methylation data from the  
36 external AML sources, our study used the data generated by the approach (3), which is independent  
37 from any specific phenotype and provides a general summary of TCGA methylation data. We did not  
38 use the data from approach (4) because it discards probes with a standard deviation below a specified  
39 cutoff, so the dataset contained only ~2K genes, too small compared to the ~17K genes in the MERGE  
40 model.

1 After getting each sample's (patient's) methylation values for each gene as explained above, we used  
2 the sample mean across patients to compute each gene's methylation score. While other ways may  
3 provide a summary statistic across all patients, we considered only the sample mean in the current  
4 study: mean is the most commonly used measure of central tendency for continuous-valued variables,  
5 and several authors have averaged methylation values over samples (e.g., Moarii, Boeva, Vert, & Reyal,  
6 2015).

7

### 8 **Supplementary Note 6: Standardization of driver features, predictors and response variables**

9 We standardized each driver feature before running the MERGE algorithm so that each feature had  
10 mean 0 and variance 1. We performed standardization so that despite different scales, driver features  
11 were treated fairly when estimating MERGE scores. We standardized binary features (candidate  
12 regulator and CNV) as we did other non-binary features. For any statistical model that combines data  
13 from several different kinds of variables (i.e., features) and aims to learn weights for the variables with  
14 regularization, one must provide all variables to the algorithm on the same scale to achieve  
15 fairness<sup>10</sup>. Binary variables are not exceptions<sup>11</sup>.

16 We also standardized predictor variables (gene expression levels) and response variables (drug  
17 sensitivity measures) for MERGE and all other methods compared to MERGE in our experiments:  
18 ElasticNet, multi-task learning, Pearson's  $p$ -value, Spearman  $p$ -value, and Bayesian multi-task multiple  
19 kernel learning (MKL).

20

### 21 **Supplementary Note 7: Measuring the significance of association between a gene expression level 22 and a drug sensitivity measure**

23 We computed the  $p$ -value of association between each gene and each drug using t statistics and  
24 associated  $p$ -values, measuring the correlation between the gene and drug in a univariate linear  
25 regression model. Then, we applied FDR correction for multiple hypotheses for all pairs of genes and  
26 drugs, using the Benjamini & Hochberg (1995) method. We considered the (genome-wide) FDR  
27 corrected  $p$ -value  $< 0.1$  to be significant throughout the paper. When we measured the consistency of  
28 gene-drug associations in CCLE data, we used an uncorrected  $p$ -value of 0.1 as a cutoff to indicate that  
29 a gene-drug association discovered in patient data was replicated in validation data. We did not apply  
30 the FDR correction method in validation data because the FDR correction process is designed to  
31 maintain a certain FDR level when making a large number of hypotheses, and we do not make  
32 hypotheses during validation.

33

### 34 **Supplementary Note 8: The MERGE algorithm**

35 To learn the MERGE scores, we developed a probabilistic graphical model approach that provides a  
36 statistical model to represent relationships among variables in input data and a principled way of  
37 learning the parameters of the model from data<sup>13</sup>. Let  $w_{ij}$  represent the magnitude and sign of the  
38 impact of gene  $i$  on drug  $j$ . This relationship can be modeled as:  $y_j \sim \mathcal{N}(w_{ij}x_i, \mathcal{E}^2)$ , where  $x_i$  represents  
39 the expression level of gene  $i$  and  $y_j$  represents the drug response measure (i.e., AUC) of drug  $j$ . A  
40 conventional statistical model widely used in a genome-wide association analysis does not model a

1 marker potential (Fig. 1a). In the conventional model, we estimate  $w_{ij}$  for each combination of a gene  
 2 and a drug by finding  $w_{ij}$ , which minimizes the squared error of prediction across all samples (here,  
 3 patients):

$$4 \quad \underset{w_{ij}}{\text{minimize}} \sum_{n \in \{\text{all patients}\}} (y_j^{(n)} - w_{ij} x_i^{(n)})^2, \quad \text{Eq (1)}$$

5 where  $(n)$  means the  $n$ th sample. Then, the learned  $w_{ij}$  value would equal Pearson's correlation  
 6 coefficient between the two variables,  $x_i$  and  $y_j$ , when both  $x_i$  and  $y_j$  were scaled to have the same  
 7 standard deviance (specifically through the common standardization procedure).

8 MERGE's key innovation is the modeling of the *prior probability distribution* over each  $w_{ij}$  such that it  
 9 incorporates prior knowledge on gene  $i$  in terms of its potential to be a molecular marker. We model  
 10 the prior distribution over each  $w_{ij}$  as a normal distribution  $P(w_{ij}) \sim \mathcal{N}(0, \sigma_i^2)$ , where  $\sigma_i^2$  represents a  
 11 prior variance specific to gene  $i$ . If gene  $i$  has a low value on  $\sigma_i^2$ , the weight value  $w_{ij}$  would be inclined  
 12 to be close to zero (i.e., low marker potential); if gene  $i$  has a high value on  $\sigma_i^2$ , then, since there is more  
 13 probability mass away from zero, the weight value  $w_{ij}$  would be more inclined to deviate from zero  
 14 (i.e., high marker potential). We model  $\sigma_i^2$  as a function of a weighted combination of its driver features  
 15  $\sigma_i^2 = \frac{1}{\lambda - \sum_{k=1}^5 v_k d_{ik}}$ , where  $d_{ik}$  is the value of the  $k$ th driver feature on gene  $i$ . Genes with a high value of  
 16  $(\sum_{k=1}^5 v_k d_{ik})$  would have a high variance  $\sigma_i^2$  (i.e., high marker potential); thus, we define the MERGE  
 17 score of gene  $i$  as  $(\sum_{k=1}^5 v_k d_{ik})$ .  $\lambda$  is a regularization parameter: when it is high, each  $\sigma_i^2$  would take a  
 18 lower value, which means a lower variance on the weight ( $w_{ij}$ ) values associated with each gene.

19 We learn the parameters – weight values  $w_{ij}$  for each gene  $i$  and drug  $j$ , and the driver feature weights  
 20  $v_k$  – that optimize the joint log-likelihood function  $\log P(\mathbf{X}, \mathbf{Y}, \mathbf{W}, \mathbf{V})$ , where  $\mathbf{X}$  is the expression data  
 21 matrix ( $p$  genes  $\times$   $n$  patients),  $\mathbf{Y}$  is the drug response data matrix ( $q$  drugs  $\times$   $n$  patients),  $\mathbf{W}$  is the gene-  
 22 drug weight matrix ( $p$  genes  $\times$   $q$  drugs) that contains  $w_{ij}$  for each gene  $i$  and drug  $j$ , and  $\mathbf{V}$  is a vector  
 23 that contains 5 driver feature weights. The MERGE algorithm can be seen as a process of projecting  
 24 high-dimensional gene-drug associations ( $p$  genes  $\times$   $q$  drugs) onto a lower-dimensional space by  
 25 constraining weight values based on prior information on genes' potential to drive the disease.

26 The objective function  $\log P(\mathbf{X}, \mathbf{Y}, \mathbf{W}, \mathbf{V})$  can be decomposed as

$$27 \quad \log[P(\mathbf{Y}|\mathbf{X}, \mathbf{W}, \mathbf{V})P(\mathbf{X}|\mathbf{W}, \mathbf{V})P(\mathbf{W}|\mathbf{V})P(\mathbf{V})]  
 28 \quad = \log P(\mathbf{Y}|\mathbf{X}, \mathbf{W}) + P(\mathbf{X}) + \log P(\mathbf{W}|\mathbf{V}) + \log P(\mathbf{V})  
 29 \quad = \log P(\mathbf{Y}|\mathbf{X}, \mathbf{W}) + \log P(\mathbf{W}|\mathbf{V}),$$

30 assuming a uniform prior distribution over  $\mathbf{X}$  and  $\mathbf{V}$  (i.e.,  $P(\mathbf{X})$  and  $P(\mathbf{V})$  are constant). The conditional  
 31 log-likelihoods are:

$$32 \quad \log P(\mathbf{Y}|\mathbf{X}, \mathbf{W}) = \log \prod_{i,j,n} \mathcal{N}(w_{ij} x_i^{(n)}, \mathcal{E}^2) = - \sum_{i,j,n} \left\{ \log \sqrt{2\mathcal{E}^2\pi} + \frac{(y_j^{(n)} - w_{ij} x_i^{(n)})^2}{2\mathcal{E}^2} \right\},$$

$$33 \quad \log P(\mathbf{W}|\mathbf{V}) = \log \prod_{i,j} \mathcal{N}\left(0, \frac{1}{\lambda - \sum_{k=1}^5 v_k d_{ik}}\right) = - \sum_{i,j} \left\{ \log \sqrt{\frac{2\pi}{\lambda - \sum_{k=1}^5 v_k d_{ik}}} + \frac{(\lambda - \sum_{k=1}^5 v_k d_{ik}) w_{ij}^2}{2} \right\},$$

34 for each gene  $i$ , drug  $j$ , and a sample  $n$ . Maximizing  $\log P(\mathbf{X}, \mathbf{Y}, \mathbf{W}, \mathbf{V})$  with respect to  $\mathbf{W}$  and  $\mathbf{V}$  leads to  
 35 the following optimization problem when constants are dropped and  $\mathcal{E}^2$  is set to 1 (since we

1 standardize  $\mathbf{X}$  and  $\mathbf{Y}$  before we apply the algorithm,  $\mathcal{E}^2 = 1$  is a reasonable choice that simplifies the  
2 optimization).

$$\begin{aligned} 3 \quad & \underset{w_{ij} \in \mathbf{W}, v_k \in \mathbf{V}}{\text{minimize}} \sum_{i,j} \left\{ \sum_n (y_j^{(n)} - w_{ij} x_i^{(n)})^2 \right\} + \sum_{i,j} (\lambda - \sum_{k=1}^5 v_k d_{ik}) w_{ij}^2 - \sum_{i,j} \log(\lambda - \sum_{k=1}^5 v_k d_{ik}), \\ 4 \quad & \text{subject to } \lambda - \sum_{k=1}^5 v_k d_{ik} > 0 \text{ for each gene } i. \end{aligned} \quad \text{Eq (2)}$$

5 The first term is the loss function for learning the value of  $w_{ij}$  (for each gene  $i$  and drug  $j$ ) that captures  
6 the degree of association between gene  $i$  and drug  $j$ . The second term can be viewed as a weighted  $L_2$   
7 regularization term that favors small values on  $w_{ij}$  (which improves generalizability of the learned  
8 model) with a different strength for each gene depending on the value of  $(\lambda - \sum_{k=1}^5 v_k d_{ik})$ . A gene  $i$   
9 with a high value of  $(\sum_{k=1}^5 v_k d_{ik})$  (i.e., MERGE score) would be regularized weakly and more inclined  
10 to have a weight value  $w_{ij}$  with a large magnitude. The last term requires the regularization parameter  
11  $(\lambda - \sum_{k=1}^5 v_k d_{ik})$  to be positive and encourages it to take on relatively larger values.

12 We iteratively estimate the optimization variables  $\mathbf{W}$  and  $\mathbf{V}$  using a block coordinate descent  
13 procedure<sup>14-16</sup> until convergence. The objective function of MERGE is not jointly convex with respect to  
14  $\mathbf{W}$  and  $\mathbf{V}$ , though it is convex with respect to each set of parameters with the other set held fixed. When  
15  $\mathbf{V}$  is held fixed, the objective is convex with respect to  $\mathbf{W}$ ; when  $\mathbf{W}$  is held fixed, the objective is convex  
16 with respect to  $\mathbf{V}$ . This means that each learning step in the block coordinate descent algorithm  
17 (learning an element in  $\mathbf{V}$  or in  $\mathbf{W}$ ) is a convex optimization problem with a single local minimum that  
18 is also the global minimum.

19 We performed our MERGE runs using R (version 3.3.2) on a machine with an Intel(R) Xeon(R) E5645  
20 2.40GHz CPU and 24GB RAM. A MERGE run on the data with ~17K genes, 53 drugs and 30 samples  
21 took 12 seconds on that machine.

22 No modifications or improvements on the algorithm were made based on any validation analyses, i.e.,  
23 the cross-validation tests involving two groups of samples, the leave-one-out cross-validation (LOOCV)  
24 test for prediction, and testing on 14 AML cell lines or the additional 12 patient samples. In each of  
25 these experiments, we chose the value of the hyperparameter  $\lambda$  by cross-validation (**Supplementary**  
26 **Note 15**).

27

### 28 **Supplementary Note 9: Clinical information on the validation data from additional 12 AML patient** 29 **samples**

30 The additional 12 patients we used for validation (**Fig. 3c**) were enrolled in an open clinical trial (High  
31 Throughput Drug Sensitivity Assay and Genomics-Guided Treatment of Patients with Relapsed or  
32 Refractory Acute Leukemia NCT02551718). For those 12 samples, we measured gene expression levels  
33 using the newer RNA-seq technology while we had the microarray gene expression from the initial 30  
34 patient samples (**Supplementary Note 1**). The median age was 58, and 5 had antecedent hematologic  
35 disorders. According to European LeukemiaNet criteria<sup>4</sup>, 7 samples were in favorable risk group, 3 in  
36 intermediate-1, 1 in intermediate-2, and 8 were in the adverse risk cytogenetics group. Four samples  
37 were primary refractory, and 6 samples relapsed after allogeneic transplant. The average number of  
38 prior regimens used was 5.

39

1 **Supplementary Note 10: Details on the implementations of the methods compared to MERGE**

2 For ElasticNet, we used the R package *glmnet*<sup>17</sup> available on CRAN. For multi-task learning<sup>18</sup>, the  
3 MATLAB implementation was available from Pong, Tseng, Ji, & Ye (2010) (on  
4 <http://www.mypolyuweb.hk/~tkpong/>). For Bayesian multi-task MKL, we used the R code provided as  
5 supplementary to Costello et al. (2014).

6 As mentioned in **Supplementary Note 6**, we standardized both the predictor and response variables  
7 before applying each method, as we did for MERGE. In addition, as with MERGE, we chose the tuning  
8 parameters for each method in the comparison using LOOCV. These include the mixing parameter  $\alpha$   
9 and regularization parameter  $\lambda$  for ElasticNet, the regularization parameter  $\mu$  for multi-task learning,  
10 and  $\alpha$  and  $\beta$ , which are, respectively, the shape and rate parameters of the Gamma priors, for Bayesian  
11 multi-task MKL.

12 Comparing MERGE to the other methods in **Fig. 3** and **4c** requires ordering of the gene-drug  
13 associations by the other methods, as with MERGE. For Pearson's P-value or Spearman P-value  
14 methods, we sorted the gene-drug pairs based on decreasing significance of correlation (Pearson's or  
15 Spearman correlation, depending on the method). ElasticNet and multi-task learning are regression  
16 methods, and they learn coefficients for the predictor-response variable pairs. For ElasticNet, we ran  
17 the method for each of the 53 drugs separately and concatenated the resulting gene coefficients to get a  
18 matrix of size  $\#genes \times \#drugs$ . The multi-task learning method, on the other hand, learns the  
19 coefficients for all drugs jointly; thus, a single run of this algorithm gives us a coefficient matrix of size  
20  $\#genes \times \#drugs$ . After determining a coefficient matrix, we sorted gene-drug pairs, for each of  
21 ElasticNet and multi-task learning methods, based on decreasing absolute value of the coefficients (i.e.,  
22 decreasing strength of gene-drug associations). After sorting gene-drug pairs for each method in  
23 comparison to MERGE, we incremented the number of considered top gene-drug pairs by 53 (the  
24 number of drugs per gene in our application) for each increment of 1 in the x-axis in **Fig. 3** and **4c**.

25 To generate heat maps for the alternative methods (**Supplementary Fig. 3**), we computed gene scores  
26 (as with MERGE scores) based on each method. For this purpose, we first sorted the gene-drug pairs in  
27 *increasing* order of their importance for each method (i.e., in increasing significance of correlation for  
28 the Pearson's and Spearman P-value methods, and in increasing absolute value of the coefficients for  
29 the ElasticNet and multi-task learning methods). For each gene  $G$ , the score was computed as the sum  
30 over all indices corresponding to that gene's associations in the sorted weight matrix. If a gene had  
31 many drug associations with high absolute weights, then those associations would be positioned  
32 towards the end of the sorted weight matrix, which would increase the score of  $G$ .

33 For the Bayesian multi-task MKL method, we used only gene-set views and the discretized view<sup>20</sup>  
34 computed on gene expression data since we had no epigenomic or proteomic profiling data from the 30  
35 AML patient samples.

36

37 **Supplementary Note 11: Computing the significance of the enrichment of the drug classes based on**  
38 **mechanism of action within drug clusters showing similar patient responses**

39 To verify that drugs with similar mechanisms of action indeed showed similar response across patients,  
40 we used the dendrogram (**Fig. 4a**) generated by agglomerative hierarchical clustering. For hierarchical



1 clustering, we used Euclidean distance as the dissimilarity metric, and we used average linkage as the  
2 clustering method to cluster the drugs based on the response of 30 patient samples to those drugs.  
3 In the dendrogram, for each internal node that had 3 to 8 drugs in its leaves, we first retrieved a unique  
4 set of drug classes that contained at least one drug from the node's downstream drugs. Then, we  
5 checked the enrichment of each of these drug classes in the set of the downstream drugs of that node  
6 using Fisher's exact test. Each of the enrichment  $p$ -values we present in Fig. 4a is FDR-corrected for the  
7 number of drug classes tested for the corresponding node using the Benjamini & Hochberg (1995)  
8 method.

9

## 10 **Supplementary Note 12: Computing each gene's drug class specificity (DCS) measure**

11 First, for each pair of [gene A, class B], we computed the significance of the overlap between the drugs  
12 in B and the drugs gene A's expression level is significantly associated with, measured by Fisher's exact  
13 test  $p$ -value. Then, for each gene A, we computed a specificity measure that we named *drug class*  
14 *specificity* (DCS) score, by combining the  $p$ -values across all classes, as follows:

$$\text{DCS}_A = \frac{1}{\text{total \# of drug classes}} \sum_{B \in \{\text{drug classes}\}} -\log_{10}[\text{Fisher's exact test } p\text{-value}_{AB}] \quad .$$

15 Mathematically, Fisher's exact test is based on the following numbers for each pair of [gene A, class B]:  
16 (1) the total number of drugs with which A is significantly associated, (2) the number of drugs in class  
17 B with which A is significantly associated, (3) the number of drugs in class B, and (4) the total number  
18 of drugs (53 in our experiments). The  $p$ -value measures the significance of (2) based on the  
19 hypergeometric distribution. Therefore, it measures the specificity of the association between gene A  
20 and class B.

21

## 22 **Supplementary Note 13: Summary description of the MERGE probabilistic model**

23 MERGE is a probabilistic, model-based approach that uses MAP to estimate parameters. A  
24 probabilistic, model-based approach provides an expressive model to describe relationships among  
25 variables. Moreover, the probabilistic relationships can be read from the learned model and thus, often  
26 directly lead to a comprehensive biological interpretation. In MERGE, the prior variance of the gene-  
27 drug weights is interpreted as the corresponding gene's biomarker potential.

28 We modeled  $W$  and  $V$  in a Bayesian sense (i.e., they are parameters for which belief in their values is  
29 modeled), where  $W$  is modeled as a Gaussian random variable whose variance is modeled based on  $V$ ,  
30 and  $V$  is modeled as a uniform random variable (i.e.,  $P(V)$  is constant).

31 Instead of using a traditional Bayesian approach (i.e., estimating  $P(\theta | D)$ , the full posterior  
32 distribution, over parameters  $\theta$  where  $D$  represents the data), we employed *maximum a posteriori*  
33 *probability (MAP) estimation*, i.e., obtaining a point estimate of  $\theta$  that maximizes  $P(\theta | D)$ . In other  
34 words, we optimized  $\log P(X, Y, W, V)$  with respect to  $W$  and  $V$ . MAP estimation has two advantages  
35 over the traditional Bayesian approach. First, estimating specific parameter values makes biological  
36 interpretation straightforward. For example, specific parameter values of  $v_k$  coefficients enable an

1 efficient computation of MERGE scores and straightforward interpretation of how driver features affect  
2 the MERGE score (i.e., biomarker potential). Second, MAP estimation allows a much simpler parameter  
3 learning procedure, especially when  $P(\theta | D)$  does not have a closed-form solution. Penalized linear  
4 regression models, such as LASSO (or Ridge), also employ MAP estimation for a probabilistic model  
5 (specifically, linear regression model) with a Laplacian (or Gaussian) prior for  $P(\theta)$ , where the  
6 parameter  $\theta$  means the  $W$  values. MERGE extends the penalized linear regression models by explicitly  
7 modeling the variance of the  $W$  parameters based on  $V$  and the driver features of genes.

8

#### 9 **Supplementary Note 14: Initialization of MERGE parameters and identifiability of the MERGE** 10 **model**

11 In our application of MERGE, we initialized all five  $v_k$  values to zero, which provided an unbiased  
12 starting point (i.e., giving an equal prior variance to the weight values of all genes).

13 As noted previously, the MERGE objective function represented in Eq (2) is non-convex; thus, different  
14 initializations of the  $V$  vector (of  $v_k$  values, each for a different driver feature) may lead to different  
15 learned parameters, i.e., different local minima of the objective function. In practice, however,  
16 depending on the objective function and the input data, it is possible that a roughly unique solution can  
17 be empirically identified. One way to check is to try multiple runs with different parameter  
18 initializations and see whether these runs converge to roughly the same point.

19 We observed that when we tried different initializations of  $V$  (and correspondingly  $W$ ), the learned  
20 parameters were very similar to each other. Below, we describe our results on the consistency between  
21 the zero and random initializations.

22 We performed 20 different runs of MERGE where we initialized  $v_k$  values so they could be generated  
23 randomly from a standard normal distribution. Then, we compared the resulting training objective  
24 function values and the MERGE scores from these 20 runs to those from the MERGE run used in our  
25 paper (i.e., where we initialized all five  $v_k$  values to zero). We performed this experiment with the same  
26 hyperparameter value selected by LOOCV and used for the final model ( $\lambda = 20$ ) (**Supplementary Fig.**  
27 **11a**) as well as with a different  $\lambda$  value ( $\lambda = 50$ ) (**Supplementary Fig. 11b**). As shown in the top of  
28 **Supplementary Fig. 11a**, for  $\lambda = 20$ , only 4 of 20 runs resulted in a smaller objective function (i.e., better  
29 local optima) compared to our initialization with zero  $v_k$  values, and the difference was very small. All  
30 20 runs with random initializations resulted in almost the same  $v_k$  values shown in **Fig. 2**, and exactly  
31 the same gene rankings as those from the zero initialization of MERGE (**Supplementary Fig. 11a**,  
32 bottom). This indicates that different random initializations converged to roughly the same point. A  
33 different value of  $\lambda$  ( $\lambda = 50$ ) showed consistent patterns (**Supplementary Fig. 11b**).

34

#### 35 **Supplementary Note 15: Cross-validation experiments and selection of the hyperparameter $\lambda$**

36 In each of our experiments, the regularization parameter  $\lambda$  was determined via cross-validation, a  
37 standard way to choose tuning parameters. Since our sample size was low, we employed LOOCV since  
38 it provides the maximum number of training samples for each fold. Cross-validation experiments were  
39 performed when measuring the prediction accuracy on left-out test data (**Fig. 5**) besides when selecting  
40 the value of the hyperparameter (sparsity tuning parameter  $\lambda$ ).

1 We performed LOOCV within the training data to choose one  $\lambda$  value from the 19  $\lambda$  values in the wide  
2 range of [1,100]. We used LOOCV to choose the values of the tuning parameters for other methods as  
3 well: elastic net regression, the multitask learning method, and the DREAM challenge winner Bayesian  
4 multi-task MKL method.

5 We used cross-validation tests in three settings to select the  $\lambda$  value: (1) *Training the model using all 30*  
6 *samples (Fig. 3)*. We first performed LOOCV on 30 samples to choose the  $\lambda$  value using mean squared  
7 error (MSE), and then trained the model using all 30 samples with the chosen  $\lambda$  value. The test MSE  
8 from the LOOCV test on 30 samples is shown for varying  $\lambda$  values in **Supplementary Fig. 12**. (2)  
9 *Measuring the prediction accuracy by training the model using one 12-sample batch and testing on the other 12-*  
10 *sample batch (Fig. 5a)*. We performed LOOCV tests within 12 samples in each batch to choose the value  
11 of  $\lambda$ . We used rank correlation between the actual and predicted responses as the evaluation metric.  
12 Then we trained the model using the selected  $\lambda$  value in each batch and tested the prediction  
13 performance on the other batch. (3) *Measuring the prediction accuracy via LOOCV (Fig. 5b)*. In each fold  
14 for which we omitted one sample and used the remaining ( $n-1$ ) samples to train the model, we  
15 performed the “inner loop” LOOCV using those ( $n-1$ ) samples to choose the  $\lambda$  value and trained the  
16 model using ( $n-1$ ) samples with the chosen  $\lambda$  value. We used rank correlation between the actual and  
17 predicted responses as the evaluation metric.

18  
19  
20  
21  
22  
23  
24  
25  
26  
27  
28  
29  
30  
31  
32  
33

1 **Supplementary Figures**

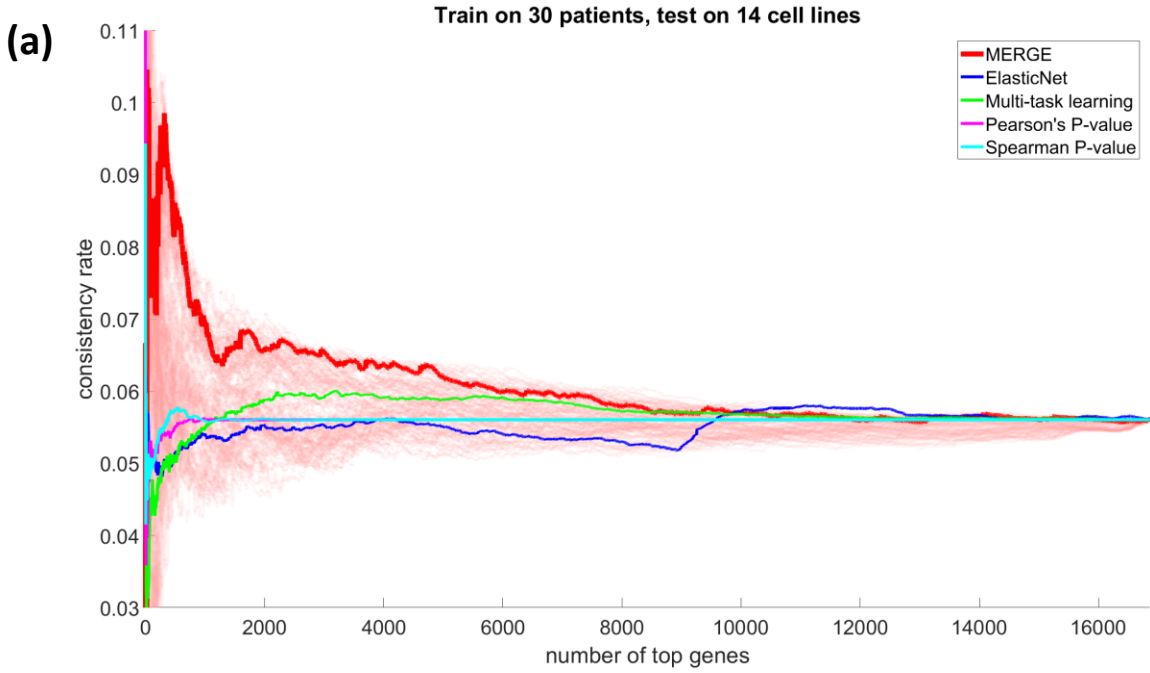

2  
3

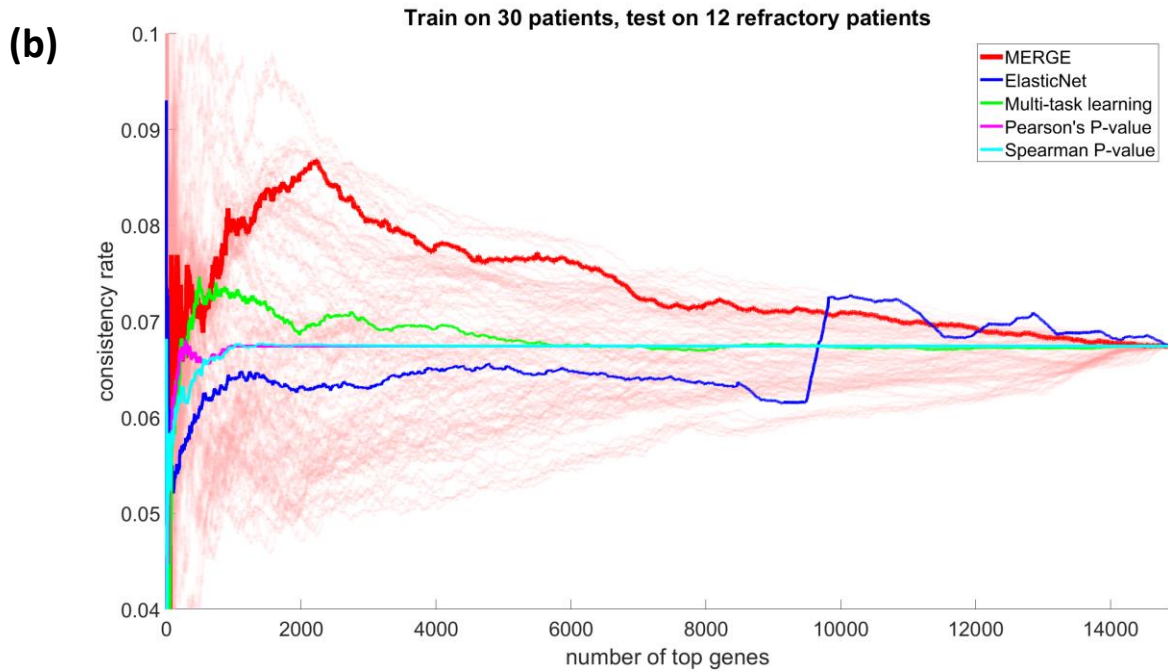

4  
5 **Supplementary Figure 1: Comparison of MERGE and four alternative methods to the 100 MERGE**  
6 **runs on random data permutations in terms of the percentage of the significant associations replicated**  
7 **in the left-out test data.** Feature consistency achieved by 100 MERGE runs (light red) each of which uses  
8 different permutations of the training samples is compared to the consistency achieved by the actual  
9 MERGE run that uses the original training data as well as to the alternative four methods as in Fig. 3. We  
10 discovered gene-drug associations within the data from 30 patient samples, and tested on (a) the 14 cell  
11 line samples, and (b) additional 12 refractory patient samples.

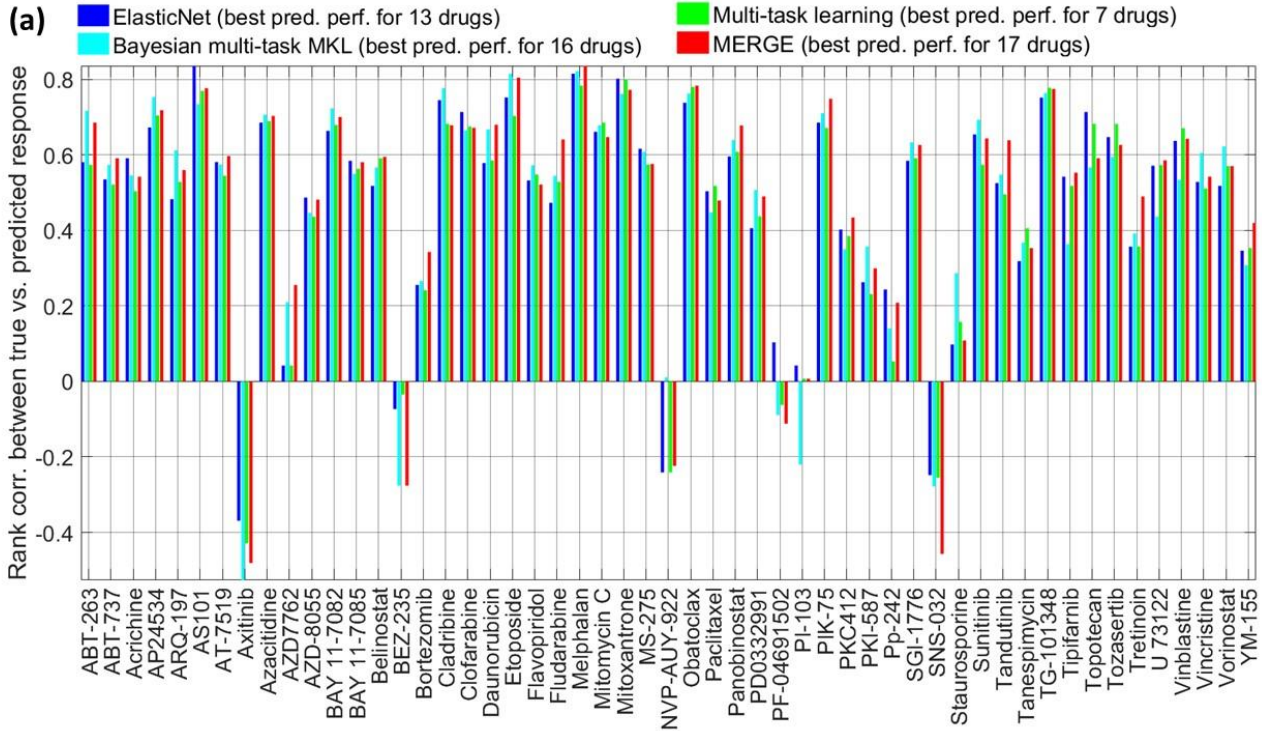

1

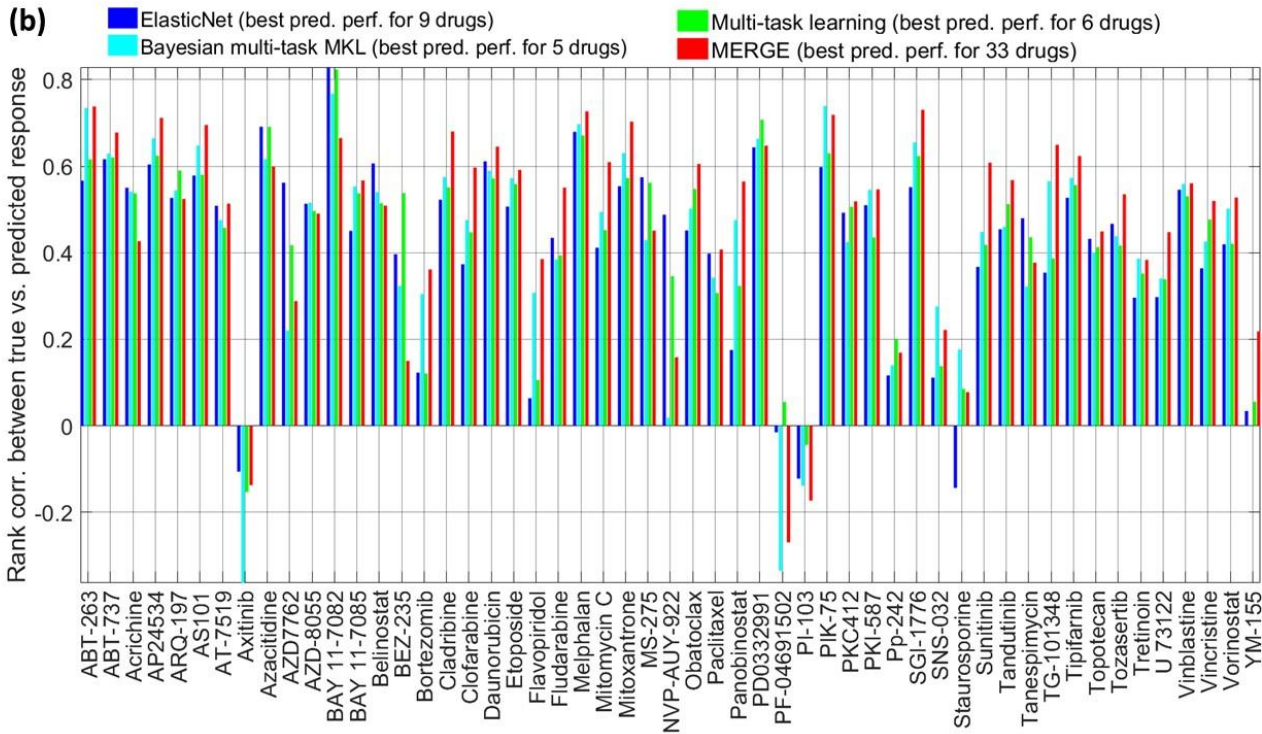

2

3 **Supplementary Figure 2: Detailed view of the prediction performance of MERGE and the three**  
 4 **alternative methods in each of the two settings shown in Fig. 5.** The performance (y-axis) is measured  
 5 by the rank-based (Spearman) correlation between the predicted response and actual drug response in  
 6 **(a)** split test, and **(b)** LOOCV. The numbers inside the parentheses in the figure's legend (bottom right)  
 7 represent the number of drugs for which the corresponding method achieved the best prediction  
 8 performance.

### (a) Genes identified by ElasticNet

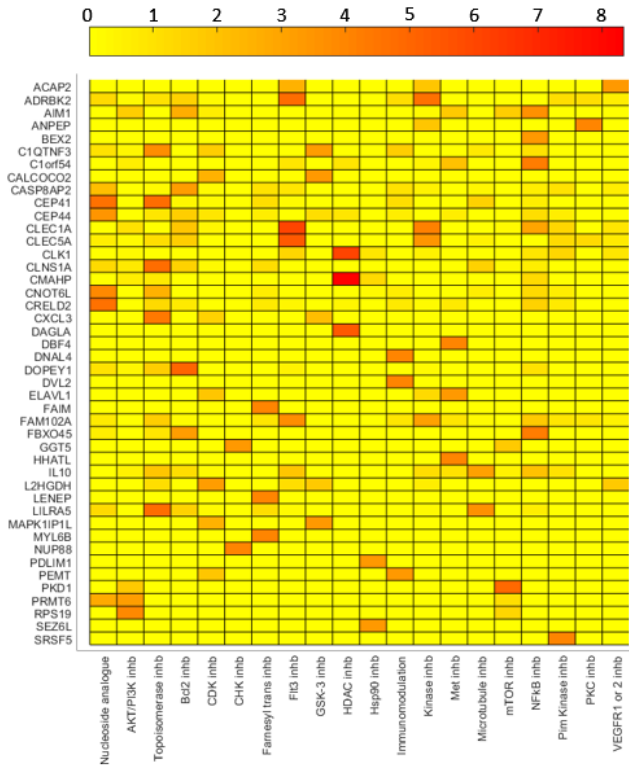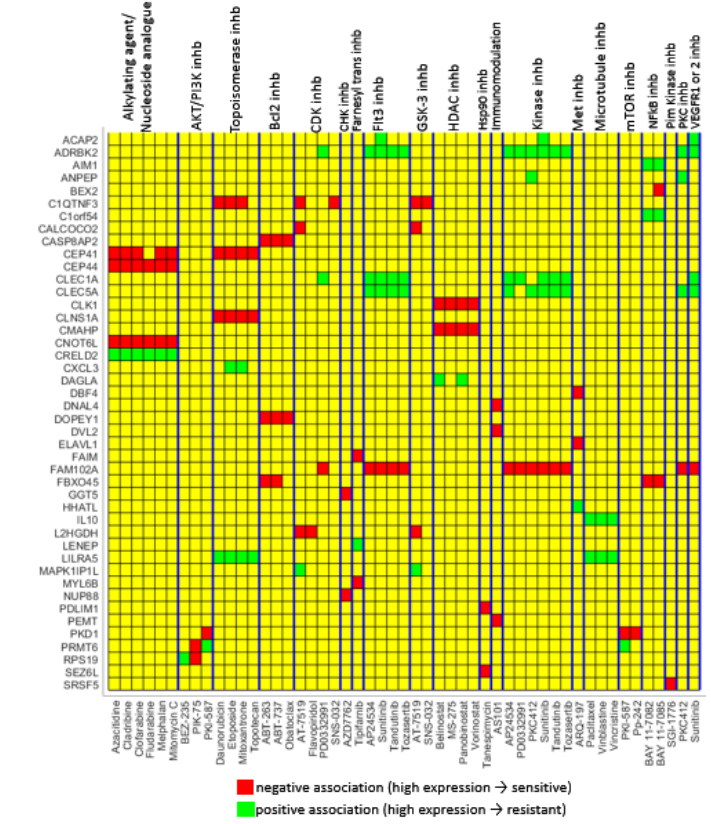

1

### (b) Genes identified by multi-task learning

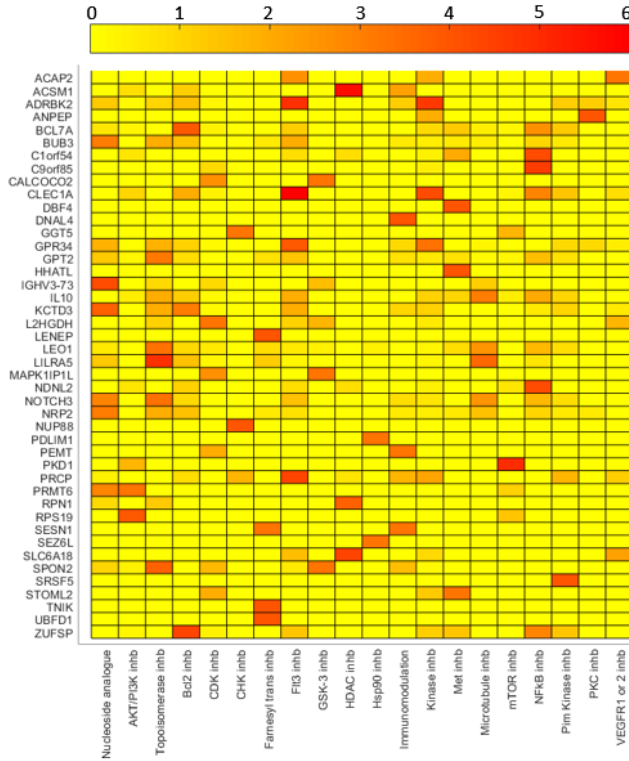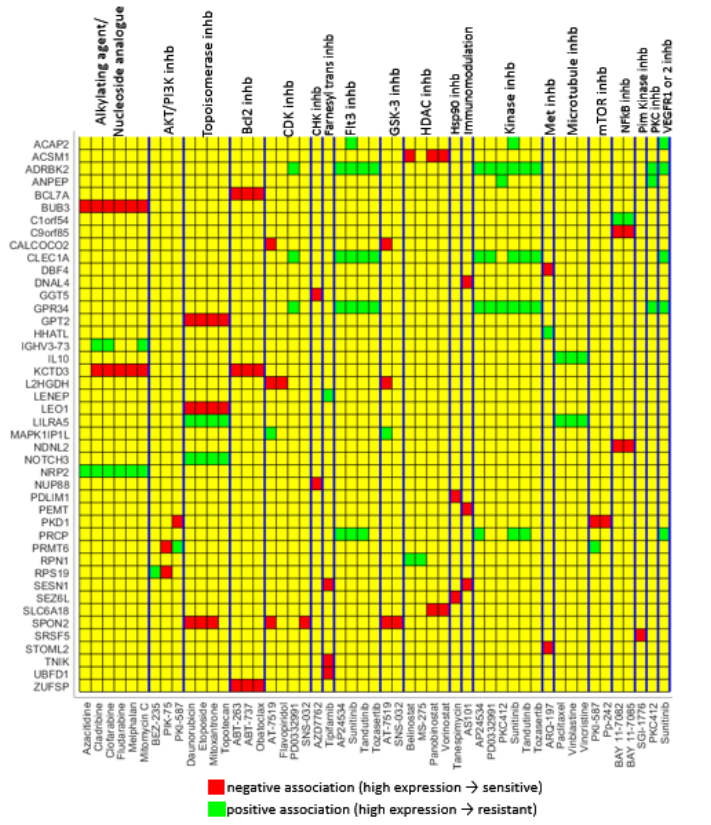

2  
3



### (c) Genes identified by Pearson's P-value

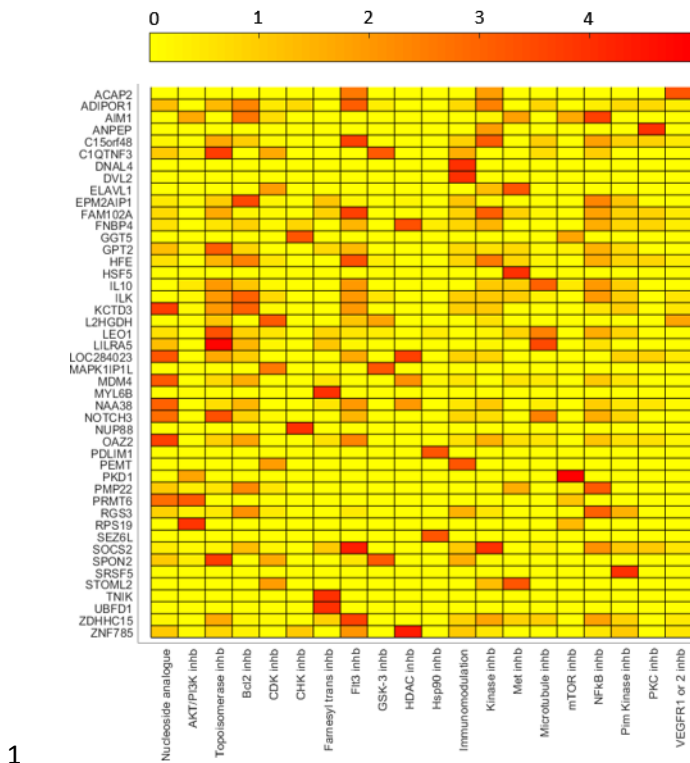

1

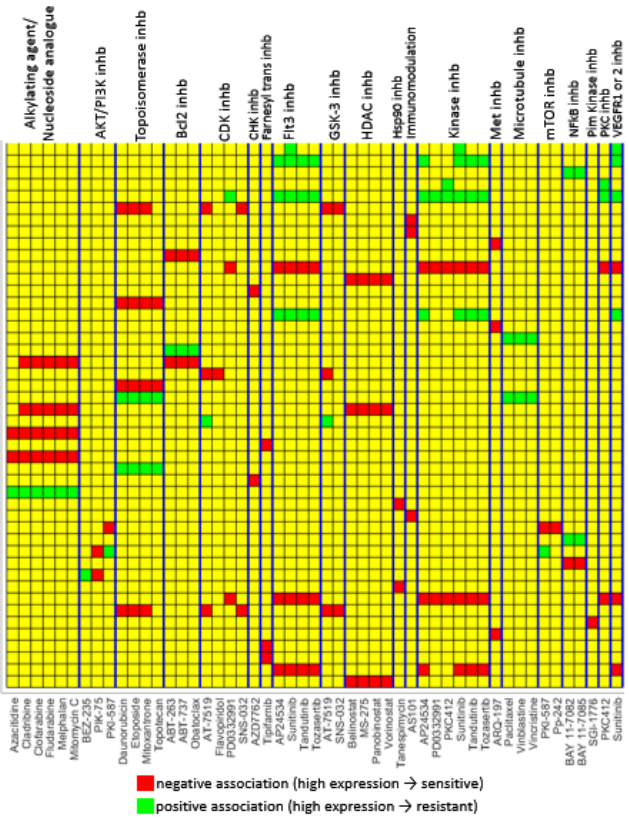

### (d) Genes identified by Spearman P-value

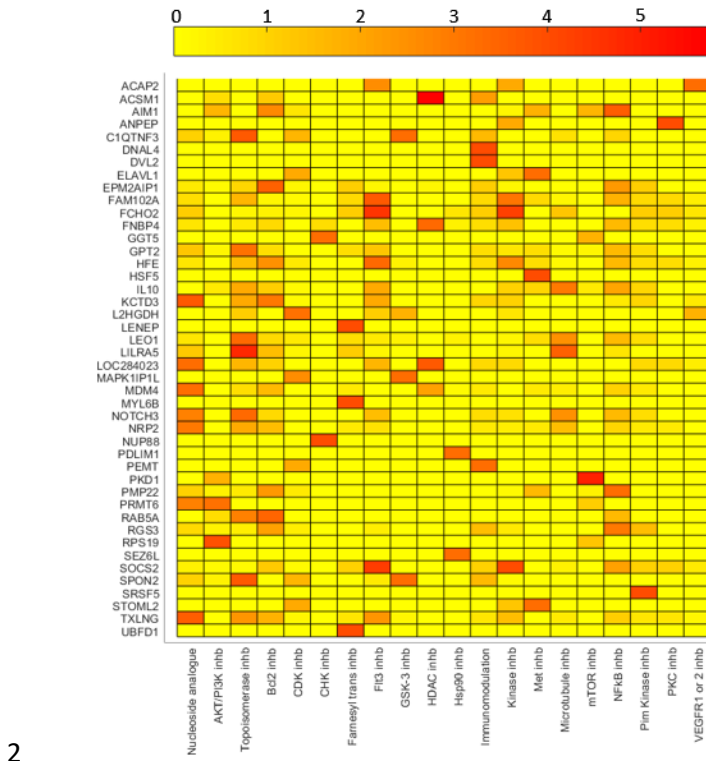

2

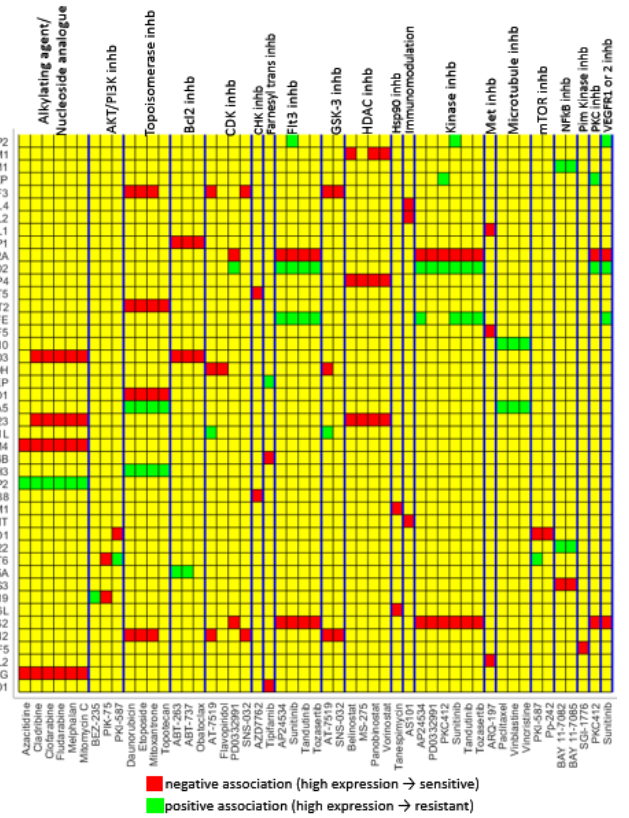

1 **Supplementary Figure 3: Heat maps that correspond to Fig. 6a-c for the four alternative methods**  
 2 **(shown in Fig. 3 and Fig. 4c). (a) ElasticNet, (b) Multi-task learning, (c) Pearson's P-value, and (d)**  
 3 **Spearman P-value. In (a)-(d), the heat map on the left shows the level of specificity of each gene to each**  
 4 **drug class, measured by  $-\log_{10}$ [Fisher's exact test p-value] for the top 3 genes selected using the**  
 5 **corresponding method; the right heat map shows the gene-drug association for the genes and drug**  
 6 **classes shown on the left heat map.**

7  
8  
9  
10  
11  
12  
13  
14  
15

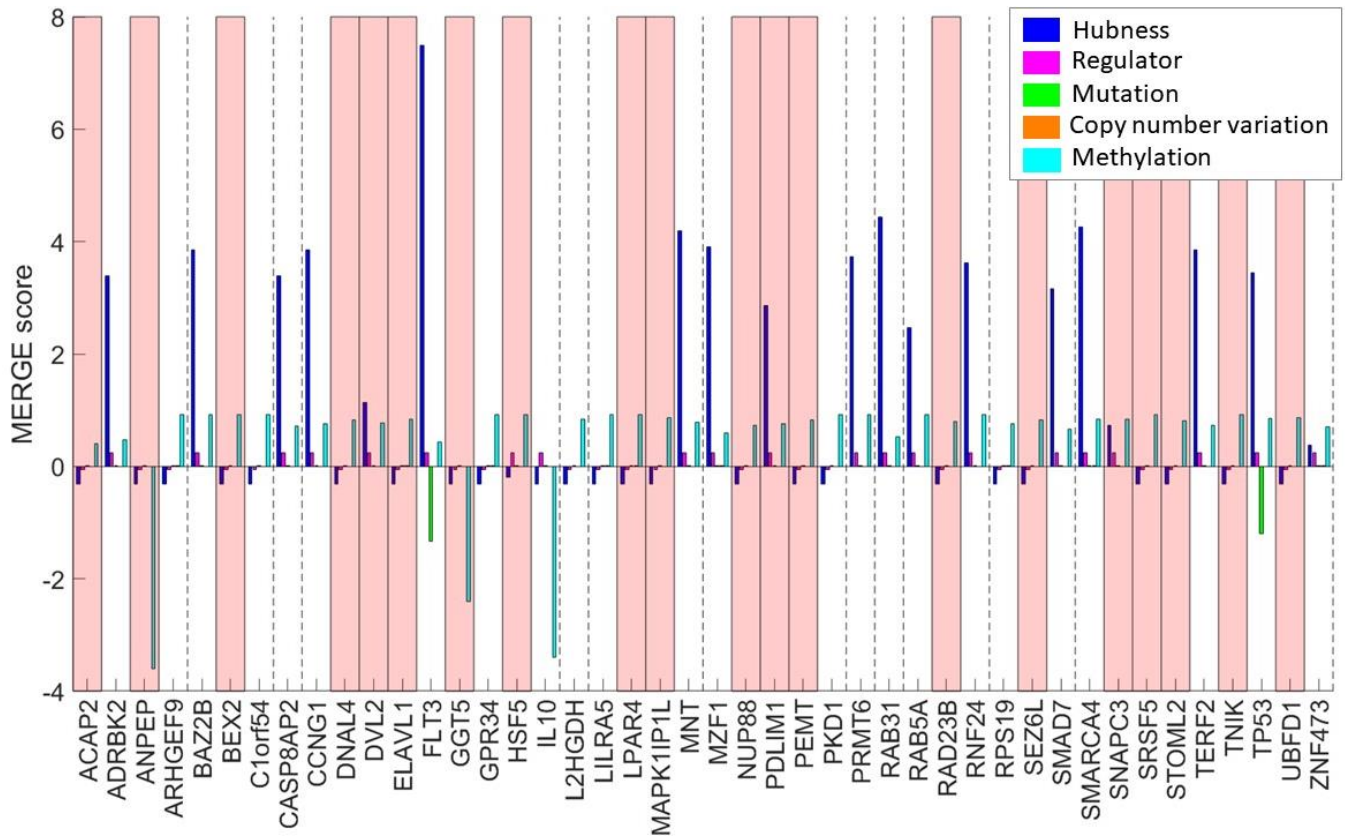

16  
17  
18  
19  
20  
21  
22  
23

**Supplementary Figure 4: For each of the genes in Fig. 6a and b, the amount of contribution of each driver feature on the MERGE score, measured by [driver feature weight × driver feature value] for a driver feature. The genes highlighted in red are associated with a single drug (i.e., the genes corresponding to the rows in Fig. 6b that have a single unique red or green square). We note that the genes with a high hubness contribution (blue bar > 3) tend to have significant associations with more than one drug (Fisher's exact test  $p$ -value =  $1.7 \times 10^{-5}$ ).**



1

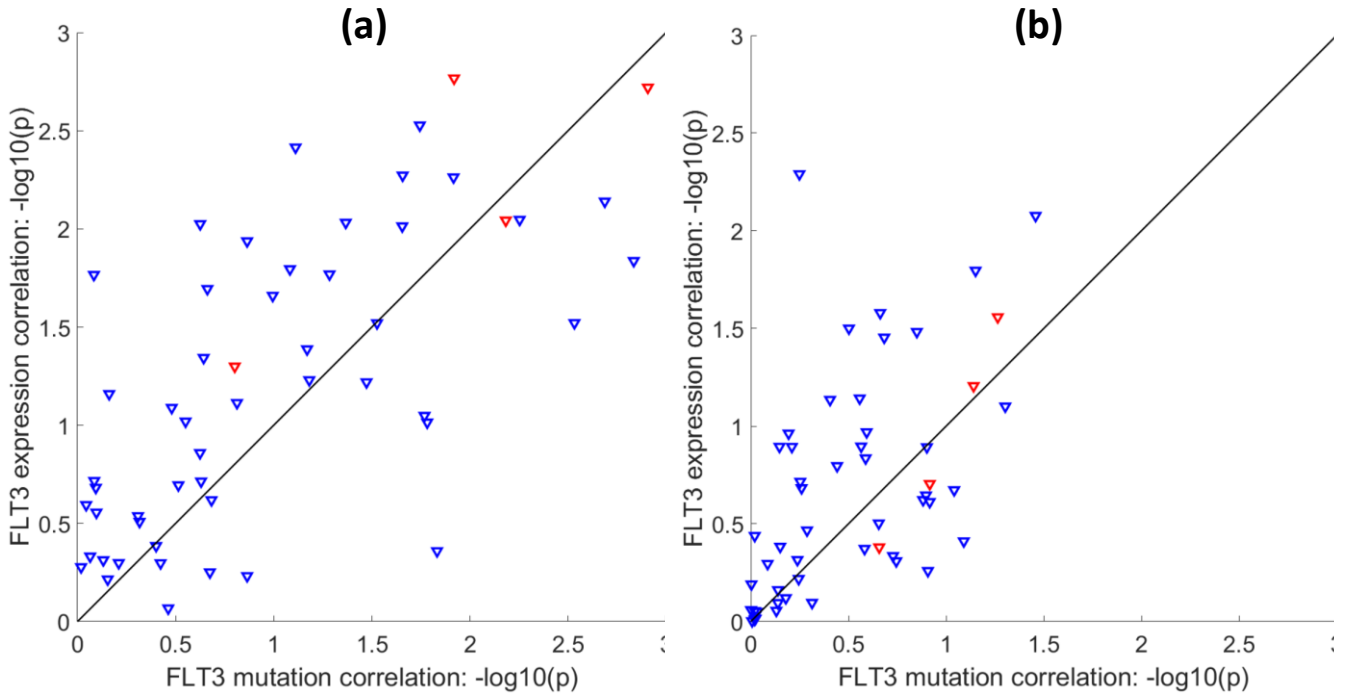

2

3 **Supplementary Figure 5: Comparison of *FLT3* expression level to *FLT3* mutation status in terms of**  
4 **significance of correlation with drug response.** For each of the 53 drugs, the  $-\log_{10}p$ -value representing  
5 the degrees of association between the drug response and *FLT3* expression level (y-axis) vs. *FLT3*  
6 mutation status (x-axis) is shown for (a) patients and (b) cell lines. The drugs highlighted in red on each  
7 scatter plot correspond to the four *FLT3* inhibitors (AP24534, Sunitinib, Tandutinib, Tozasertib) in the set  
8 of 53 drugs that we studied.

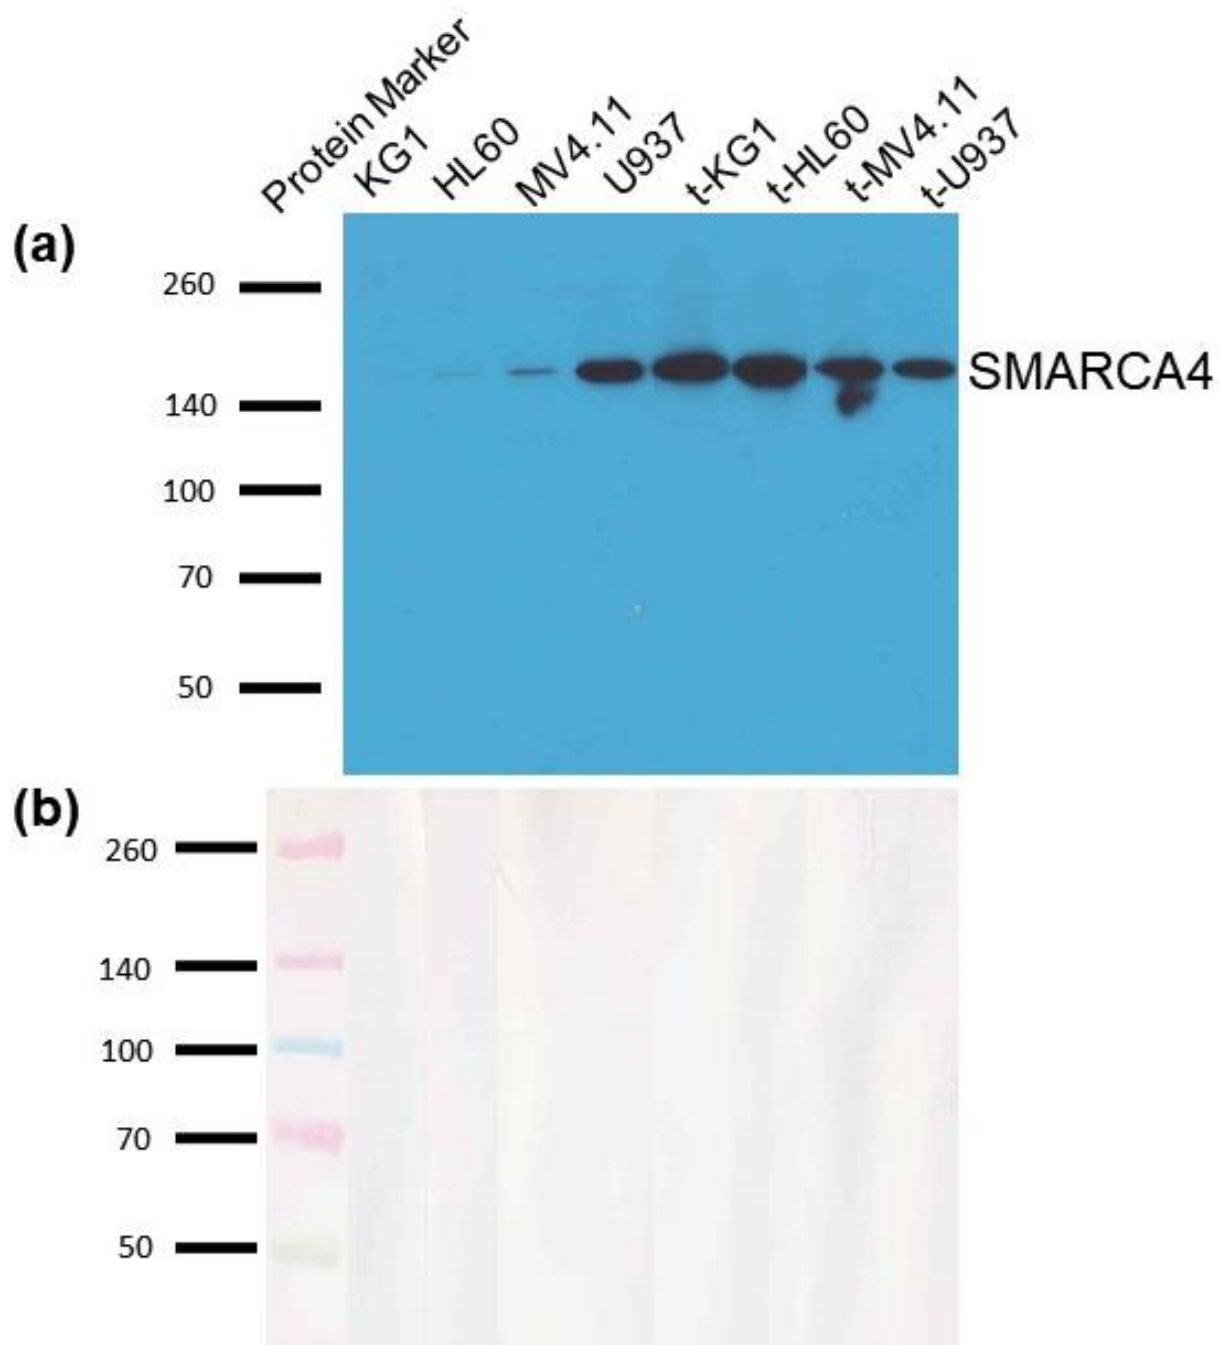

1  
2  
3  
4  
5

Supplementary Figure 6: Uncropped image of the Western blot of control and *SMARCA4* plasmid transfected AML cell lines: KG1, U937, HL60, and MV4.11. (a) Film. (b) Nitrocellulose membrane.

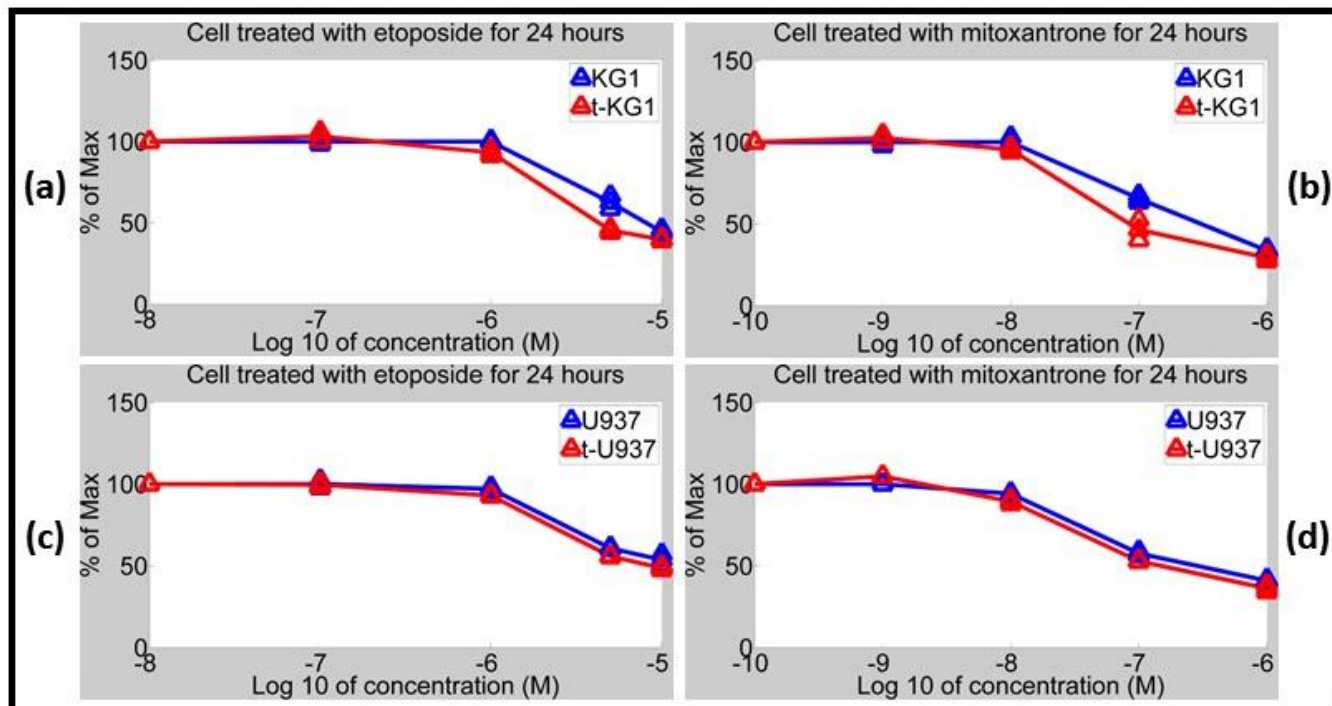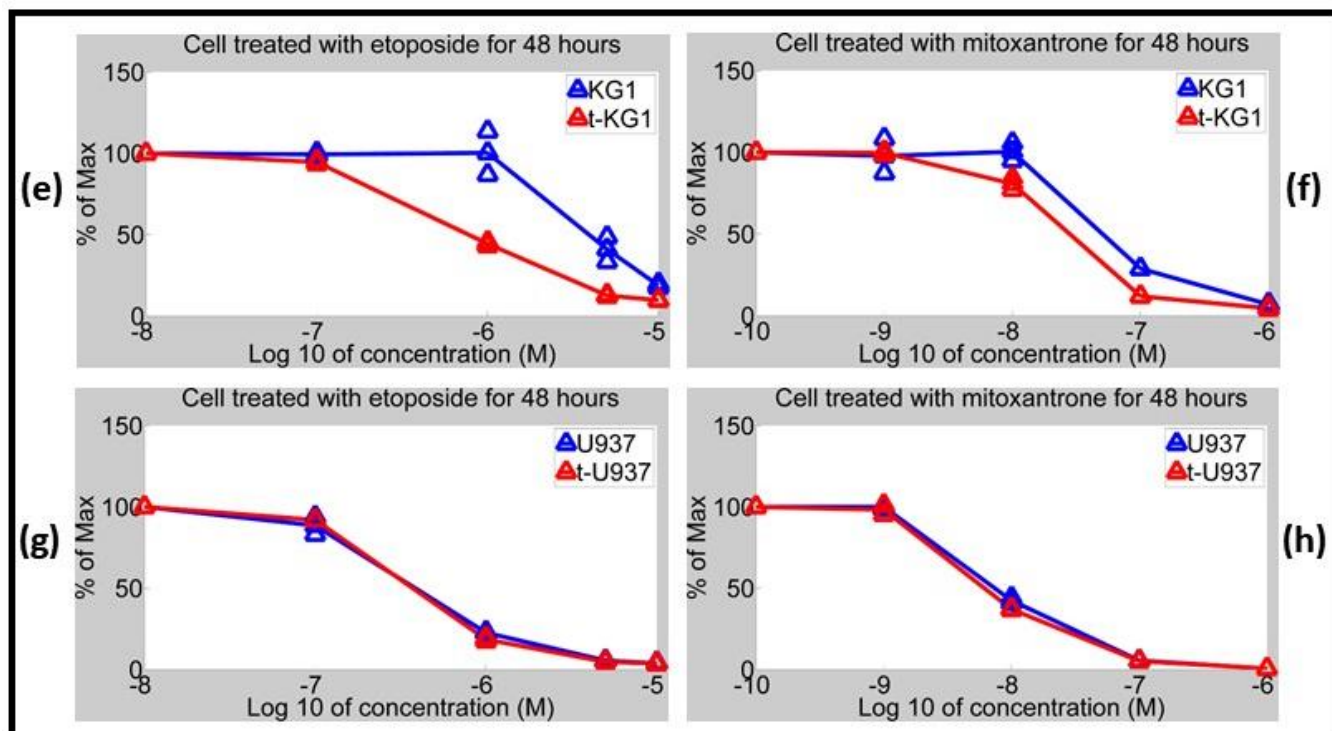

1  
 2 **Supplementary Figure 7: The dose-response curves for cell lines treated with etoposide (left panel)**  
 3 **and mitoxantrone (right panel) after 24 hours (a)-(d) and 48 hours (e)-(h).** Each plot compares KG1 with  
 4 transfected KG1 in (a)-(b) and (e)-(f), and U937 and transfected U937 in (c)-(d) and (g)-(h). Triangular  
 5 marks indicate individual data points in duplicates and the average among them. Lines connect averages  
 6 of duplicates in each concentration measured.

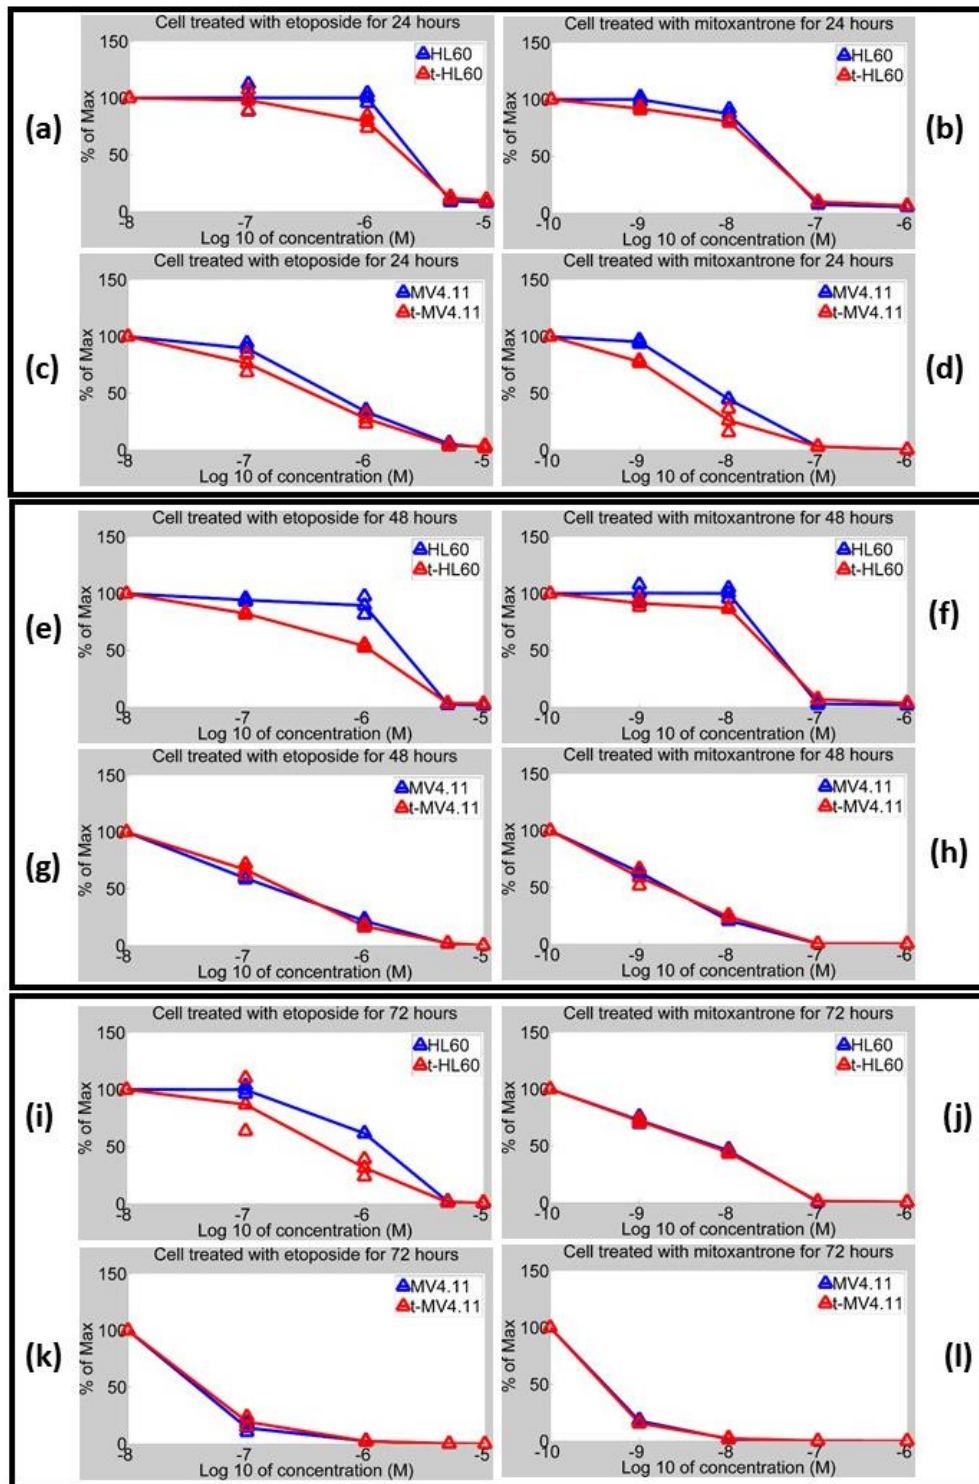

1

2 **Supplementary Figure 8: The dose-response curves for cell lines treated with etoposide (left panel)**  
 3 **and mitoxantrone (right panel) after 24 hours (a)-(d), 48 hours (e)-(h), and 72 hours (i)-(l).** Each plot  
 4 compares HL60 with transfected HL60 in (a)-(b), (e)-(f), and (i)-(j) and MV4.11 and transfected MV4.11  
 5 in (c)-(d), (g)-(h), and (k)-(l). Triangular marks indicate individual data points in duplicates and the  
 6 average over them. Lines connect averages over duplicates in each concentration measured.

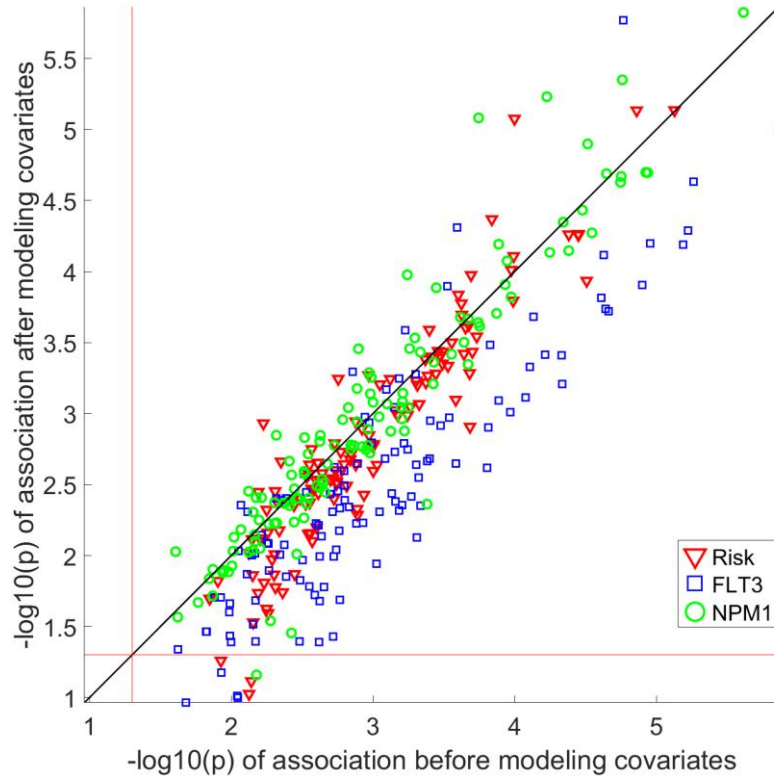

1  
2  
3  
4  
5  
6  
7  
8  
9

**Supplementary Figure 9: Comparison of the significance of the gene-drug associations ( $-\log_{10}$  p-value) with (y-axis) vs. without (x-axis) adding the available risk group/cytogenetic features as covariates. Red corresponds to cytogenetic risk covariate, blue corresponds to *FLT3* mutation status, and green corresponds to *NPM1* mutation status. The red vertical and horizontal lines correspond to  $-\log_{10} 0.05$ . Each dot corresponds to one of the 119 unique gene-drug associations shown as red or green on the heat map in Fig. 6b.**

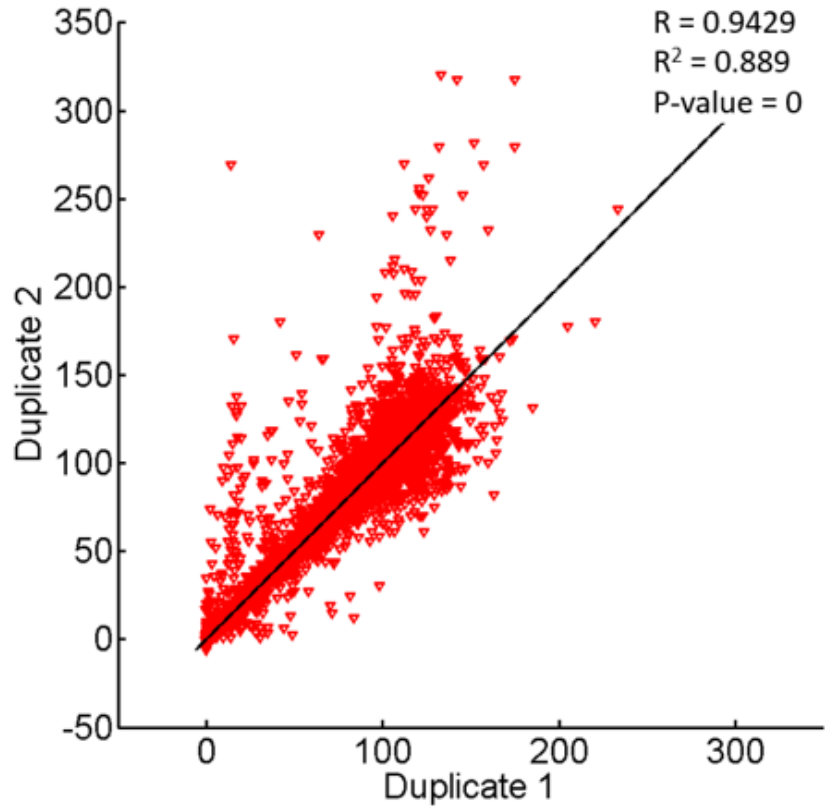

1

2 **Supplementary Figure 10: Scatter plot demonstrating the reproducibility of high-throughput drug**  
3 **sensitivity assay.** Each dot corresponds to a combination of a drug, a sample, and a specific  
4 concentration. The correlation coefficient, R<sup>2</sup> (squared correlation coefficient), and *p*-value are computed  
5 based on Pearson's correlation.

6

(a)

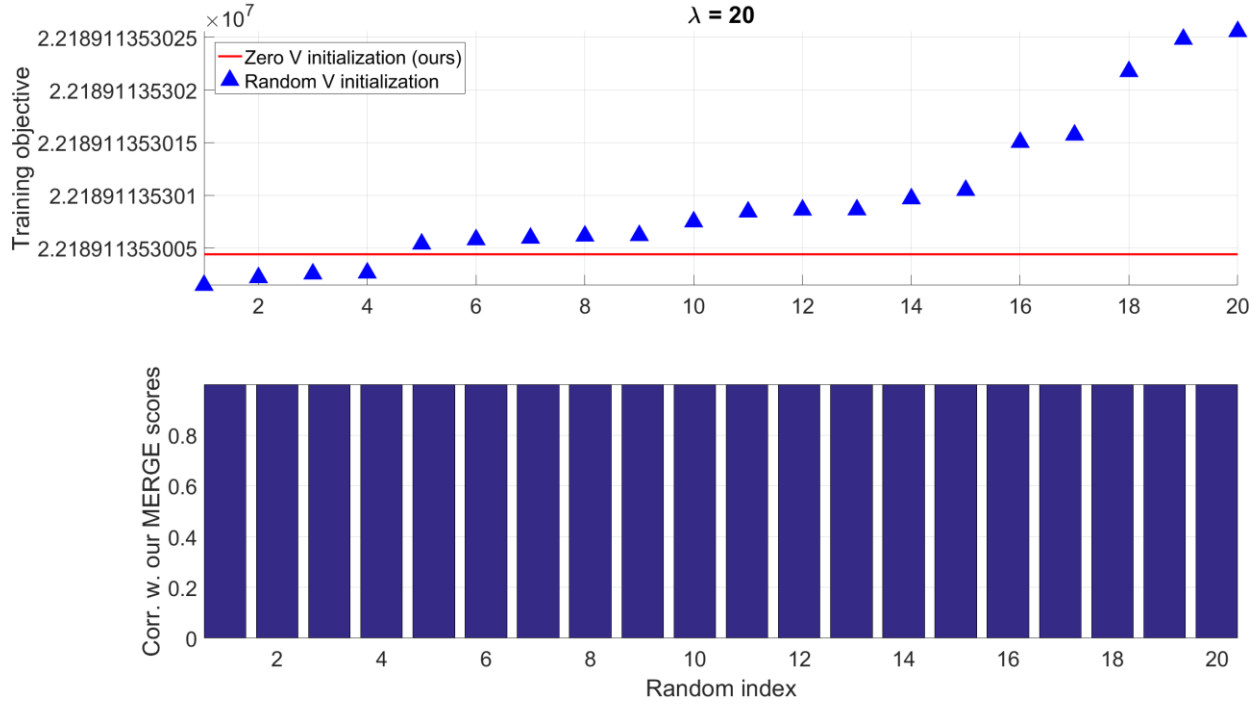

1  
2

(b)

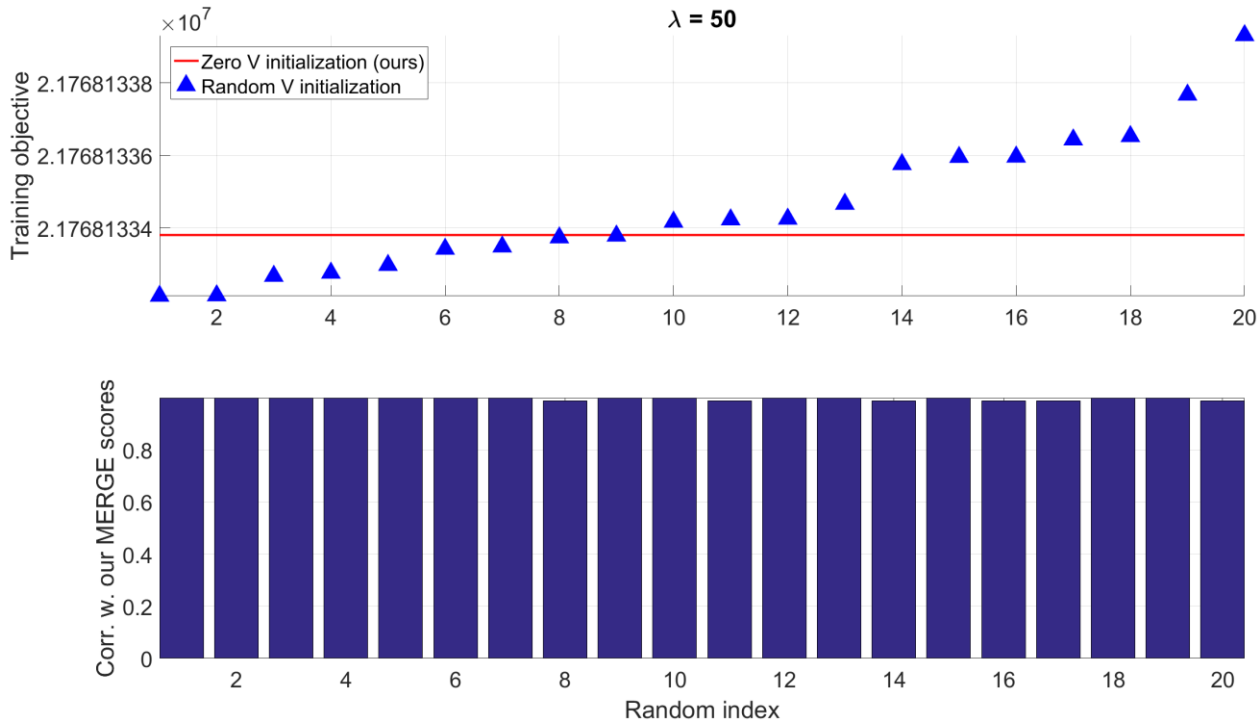

3  
4

5 **Supplementary Figure 11: For 20 random initializations of the learning parameters (x-axis), the**  
6 **training objective function values (top) and the Spearman correlation of the learned MERGE scores**  
7 **from each random initialization with those from zero initialization (used for our paper) (bottom). (a)**  
8 **We used the same  $\lambda$  value as the final MERGE model (i.e., trained based on 30 samples) that was selected**  
9 **by LOOCV ( $\lambda = 20$ ). (b) We used an additional value for the hyperparameter  $\lambda = 50$ .**

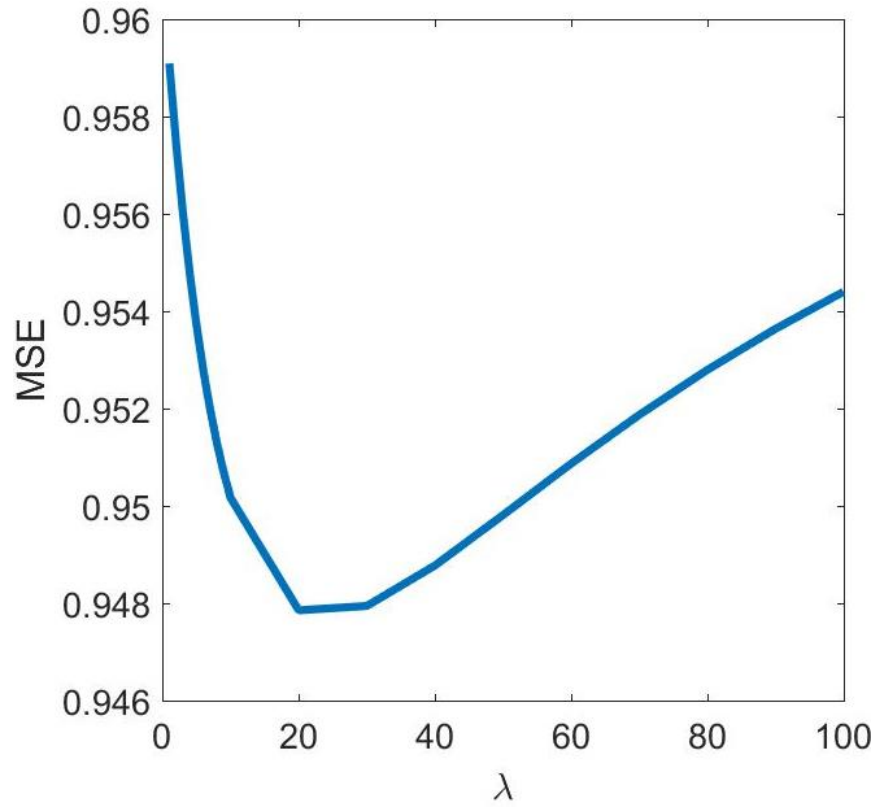

1  
2  
3  
4  
5  
6  
7

**Supplementary Figure 12: The test MSE measured by the LOOCV test for varying  $\lambda$  values.**  $\lambda$  value (combined with the driver features) is used to regularize weight values ( $w_{ij}$ ) for gene-drug pairs. Based on this plot, in our experiment with 30 samples, we use  $\lambda = 20$  since it results in the lowest test MSE.



1 **Supplementary Tables**

2

3 **Supplementary Table 1: Some properties for each of the 53 drugs.** *p*-values listed in the 4<sup>th</sup> column are  
 4 FDR-corrected for the number of drugs. Since some drugs are in multiple classes, the last column  
 5 shows the number of genes significantly associated with the drug for each class the drug is in. This  
 6 column is empty for the 3 drugs (Acrichine, U 73122 and YM-155) assigned only to the “Other” class,  
 7 which contains the drugs that do not belong to any of the 24 drug mechanism classes based on their  
 8 mechanisms of action. The footnotes (a)-(k) present details of the drugs that have a “1” in the 3<sup>rd</sup>  
 9 column or have a “-” in the last column. We note that for the drugs ABT-263 and ABT-737, the “1” in  
 10 the 3<sup>rd</sup> column reports a successor drug that is effective in AML.

| Drug Name             | Reported Clinical Efficacy in AML Treatment | Whether Any Undergoing Clinical Evaluations in AML | Significance of Association of AUC with CR | #Significantly Associated Genes | #Significantly Associated Genes after Cell Line Consistency Filter | #Significantly Associated Genes after Cell Line Consistency and Drug Class Specificity Filters |
|-----------------------|---------------------------------------------|----------------------------------------------------|--------------------------------------------|---------------------------------|--------------------------------------------------------------------|------------------------------------------------------------------------------------------------|
| ABT-263               | 0                                           | 1 <sup>(a)</sup>                                   | 0.0023                                     | 1825                            | 142                                                                | [Bcl2 inhb: 10]                                                                                |
| ABT-737               | 0                                           | 1 <sup>(b)</sup>                                   | 0.0039                                     | 1727                            | 122                                                                | [Bcl2 inhb: 11]                                                                                |
| Acrichine             | 0                                           | 0                                                  | 0.0267                                     | 1169                            | 119                                                                | - <sup>(i)</sup>                                                                               |
| AP24534 (=Ponatinib)  | 0                                           | 0                                                  | 0.0153                                     | 1911                            | 93                                                                 | [Flt3 inhb: 11]; [Kinase inhb: 5]                                                              |
| ARQ-197 (=Tivantinib) | 0                                           | 0                                                  | 0.003                                      | 1103                            | 73                                                                 | [Met inhb: 6]                                                                                  |
| AS101                 | 0                                           | 0                                                  | 0.0086                                     | 2011                            | 123                                                                | [Immunomodulation: 12]                                                                         |
| AT-7519               | 0                                           | 0                                                  | 0.4349                                     | 653                             | 61                                                                 | [CDK inhb: 1]; [GSK-3 inhb: 14]                                                                |
| Axitinib              | 0                                           | 0                                                  | 0.9724                                     | 35                              | 2                                                                  | [Kinase inhb: 0]; [VEGFR1 or 2 inhb: 0]                                                        |
| Azacitidine           | 1                                           | 0                                                  | 0.0379                                     | 1477                            | 76                                                                 | [Nucleoside analogue: 22]                                                                      |
| AZD7762               | 0                                           | 0                                                  | 0.8083                                     | 171                             | 15                                                                 | [CHK inhb: 5]                                                                                  |
| AZD-8055              | 0                                           | 0                                                  | 0.0039                                     | 649                             | 32                                                                 | [mTOR inhb: 1]                                                                                 |
| BAY 11-7082           | 0                                           | 0                                                  | 0.003                                      | 2568                            | 141                                                                | [NFkB inhb: 25]                                                                                |
| BAY 11-7085           | 0                                           | 0                                                  | 0.0021                                     | 1554                            | 66                                                                 | [NFkB inhb: 11]                                                                                |
| Belinostat            | 0                                           | 1 <sup>(c)</sup>                                   | 0.0159                                     | 696                             | 42                                                                 | [HDAC inhb: 16]                                                                                |
| BEZ-235               | 0                                           | 0                                                  | 0.2664                                     | 138                             | 11                                                                 | [AKT/PI3K inhb: 4]                                                                             |
| Bortezomib            | 1                                           | 0                                                  | 0.0094                                     | 263                             | 4                                                                  | [Proteasome inhb: 0]                                                                           |

| Drug Name                | Reported Clinical Efficacy in AML Treatment | Whether Any Undergoing Clinical Evaluations in AML | Significance of Association of AUC with CR | #Significantly Associated Genes | #Significantly Associated Genes after Cell Line Consistency Filter | #Significantly Associated Genes after Cell Line Consistency and Drug Class Specificity Filters |
|--------------------------|---------------------------------------------|----------------------------------------------------|--------------------------------------------|---------------------------------|--------------------------------------------------------------------|------------------------------------------------------------------------------------------------|
| Cladribine               | 1                                           | 0                                                  | 0.0497                                     | 1420                            | 169                                                                | [Nucleoside analogue: 69]                                                                      |
| Clofarabine              | 1                                           | 0                                                  | 0.0267                                     | 908                             | 93                                                                 | [Nucleoside analogue: 54]                                                                      |
| Daunorubicin             | 1                                           | 0                                                  | 0.0224                                     | 1833                            | 73                                                                 | [Topoisomerase inhb: 12]                                                                       |
| Etoposide                | 1                                           | 0                                                  | 0.0317                                     | 1699                            | 78                                                                 | [Topoisomerase inhb: 12]                                                                       |
| Flavopiridol             | 1                                           | 0                                                  | 0.6414                                     | 346                             | 13                                                                 | [CDK inhb: 2]                                                                                  |
| Fludarabine              | 1                                           | 0                                                  | 0.0086                                     | 1169                            | 95                                                                 | [Nucleoside analogue: 42]                                                                      |
| Melphalan                | 0                                           | 1 <sup>(d)</sup>                                   | 0.0098                                     | 2323                            | 151                                                                | [Nucleoside analogue: 45]                                                                      |
| Mitomycin C              | 0                                           | 0                                                  | 0.073                                      | 1428                            | 80                                                                 | [Nucleoside analogue: 33]                                                                      |
| Mitoxantrone             | 1                                           | 0                                                  | 0.0457                                     | 2106                            | 90                                                                 | [Topoisomerase inhb: 14]                                                                       |
| MS-275                   | 0                                           | 0                                                  | 0.1161                                     | 679                             | 26                                                                 | [HDAC inhb: 7]                                                                                 |
| NVP-AUY-922              | 0                                           | 0                                                  | 0.5051                                     | 121                             | 4                                                                  | [Hsp90 inhb: 2]                                                                                |
| Obatoclax                | 0                                           | 1 <sup>(e)</sup>                                   | 0.0276                                     | 1177                            | 48                                                                 | [Bcl2 inhb: 6]                                                                                 |
| Paclitaxel               | 0                                           | 0                                                  | 0.0684                                     | 590                             | 27                                                                 | [Microtubule inhb: 4]                                                                          |
| Panobinostat             | 1                                           | 0                                                  | 0.0159                                     | 680                             | 41                                                                 | [HDAC inhb: 18]                                                                                |
| PD0332991 (=Palbociclib) | 0                                           | 1 <sup>(f)</sup>                                   | 0.0023                                     | 1739                            | 194                                                                | [CDK inhb: 0]; [Kinase inhb: 3]                                                                |
| PF-04691502              | 0                                           | 0                                                  | 0.9764                                     | 63                              | 1                                                                  | [AKT/PI3K inhb: 0]; [mTOR inhb: 0]                                                             |
| PI-103                   | 0                                           | 0                                                  | 0.4311                                     | 47                              | 0                                                                  | [AKT/PI3K inhb: 0]; [mTOR inhb: 0]                                                             |
| PIK-75                   | 0                                           | 0                                                  | 0.0171                                     | 2151                            | 103                                                                | [AKT/PI3K inhb: 1]                                                                             |
| PKC412 (=Midostaurin)    | 1                                           | 0                                                  | 0.0344                                     | 794                             | 38                                                                 | [Kinase inhb: 4]; [PKC inhb: 1]                                                                |

| Drug Name              | Reported Clinical Efficacy in AML Treatment | Whether Any Undergoing Clinical Evaluations in AML | Significance of Association of AUC with CR | #Significantly Associated Genes | #Significantly Associated Genes after Cell Line Consistency Filter | #Significantly Associated Genes after Cell Line Consistency and Drug Class Specificity Filters |
|------------------------|---------------------------------------------|----------------------------------------------------|--------------------------------------------|---------------------------------|--------------------------------------------------------------------|------------------------------------------------------------------------------------------------|
| PKI-587 (=Gedatolisib) | 0                                           | 1 <sup>(g)</sup>                                   | 0.0385                                     | 677                             | 86                                                                 | [AKT/PI3K inhb: 1]; [mTOR inhb: 1]                                                             |
| Pp-242                 | 0                                           | 0                                                  | 0.868                                      | 179                             | 11                                                                 | [mTOR inhb: 0]                                                                                 |
| SGI-1776               | 0                                           | 0                                                  | 0.0039                                     | 1758                            | 95                                                                 | [Pim Kinase inhb: 2]                                                                           |
| SNS-032                | 0                                           | 0                                                  | 0.3771                                     | 178                             | 15                                                                 | [CDK inhb: 1]; [GSK-3 inhb: 4]                                                                 |
| Staurosporine          | 0                                           | 0                                                  | 0.3771                                     | 83                              | 11                                                                 | [Kinase inhb: 1]                                                                               |
| Sunitinib              | 0                                           | 1 <sup>(h)</sup>                                   | 0.0344                                     | 1045                            | 48                                                                 | [Flt3 inhb: 9]; [Kinase inhb: 4]; [VEGFR1 or 2 inhb: 1]                                        |
| Tandutinib             | 0                                           | 0                                                  | 0.0053                                     | 961                             | 43                                                                 | [Flt3 inhb: 11]; [Kinase inhb: 8]                                                              |
| Tanespimycin           | 0                                           | 0                                                  | 0.2049                                     | 459                             | 28                                                                 | [Hsp90 inhb: 6]                                                                                |
| TG-101348              | 0                                           | 0                                                  | 0.0344                                     | 1602                            | 90                                                                 | [JAK/STAT inhb: 1]                                                                             |
| Tipifarnib             | 1                                           | 0                                                  | 0.1329                                     | 1592                            | 67                                                                 | [Farnesyl trans inhb: 9]                                                                       |
| Topotecan              | 1                                           | 0                                                  | 0.1088                                     | 856                             | 38                                                                 | [Topoisomerase inhb: 10]                                                                       |
| Tozasertib             | 0                                           | 0                                                  | 0.0239                                     | 984                             | 46                                                                 | [Aurora kinase inhb: 0]; [Flt3 inhb: 9]; [Kinase inhb: 6]                                      |
| Tretinoin              | 1                                           | 0                                                  | 0.0039                                     | 534                             | 69                                                                 | [Retinoid: 4]                                                                                  |
| U 73122                | 0                                           | 0                                                  | 0.0344                                     | 679                             | 36                                                                 | - <sup>(i)</sup>                                                                               |
| Vinblastine            | 0                                           | 0                                                  | 0.07                                       | 1469                            | 180                                                                | [Microtubule inhb: 10]                                                                         |
| Vincristine            | 0                                           | 0                                                  | 0.0874                                     | 1154                            | 102                                                                | [Microtubule inhb: 8]                                                                          |
| Vorinostat             | 1                                           | 0                                                  | 0.0171                                     | 621                             | 29                                                                 | [HDAC inhb: 15]                                                                                |
| YM-155                 | 0                                           | 0                                                  | 0.3771                                     | 249                             | 9                                                                  | - <sup>(k)</sup>                                                                               |

- 1 (a) Its successor Bcl2 inhibitor ABT199 is effective in AML.
- 2 (b) Its successor Bcl2 inhibitor ABT199 is effective in AML.
- 3 (c) It has been tested in phase II trial in AML as a single agent.
- 4 (d) It is one of the 2 drugs of the fludarabine-melphalan preparative regimen for allogeneic transplant that has been used frequently in AML.

- (e) It has been studied in a phase I/II clinical trial as a single agent in AML.  
 (f) It is undergoing clinical trial in AML.  
 (g) It is undergoing clinical trial in AML.  
 (h) It has been studied in a phase I/II clinical trial in AML with chemotherapy.  
 (i) It is an antimalarial drug in the "Other" class.  
 (j) It is a phospholipase inhibitor in the "Other" class.  
 (k) It is a survivin suppressant in the "Other" class.

**Supplementary Table 2: Top 10 MERGE-scoring genes in each drug class shown in Fig. 6a.** Some drug classes have less than 10 genes that are specifically associated with that class and whose associations are conserved in CCLE data. Column 2 (#Drugs) indicates the number of drugs in the corresponding drug class. Column 3 (#Genes) indicates the number of top MERGE genes specifically associated with the corresponding class (the full list is in **Supplementary Data 6**). The classes highlighted in red contain only 1 drug, and the genes highlighted in yellow are those discussed in the main text.

| Drug Class                               | #Drugs | #Genes | Top 10 Genes                                                                            |
|------------------------------------------|--------|--------|-----------------------------------------------------------------------------------------|
| Alkylating agent/<br>Nucleoside analogue | 6      | 58     | <i>RAB31, CCNG1, TERF2, ZNRD1, RNF113A, SMARCC1, ZNF697, MDM4, CNOT6L, ADAM28</i>       |
| AKT/PI3K inhibitor                       | 5      | 2      | <i>PRMT6, RPS19</i>                                                                     |
| Topoisomerase inhibitor                  | 4      | 24     | <i>SMARCA4, MZF1, TP53, LEO1, BCL2, ILF3, PRMT7, CEP41, CLNS1A, GPT2</i>                |
| Bcl2 inhibitor                           | 3      | 13     | <i>CASP8AP2, SMAD7, RAB5A, ZNF420, FBXO45, ILK, BCL7A, ZUFSP, SHQ1, KCTD3</i>           |
| CDK inhibitor                            | 4      | 1      | <i>L2HGDH</i>                                                                           |
| CHK Inhibitor                            | 1      | 2      | <i>NUP88, GGT5</i>                                                                      |
| Farnesyl transferase inhibitor           | 1      | 6      | <i>SNAPC3, TNIK, UBF1, MYL6B, FAIM, LENEPI</i>                                          |
| Flt3 inhibitor                           | 4      | 16     | <i>FLT3, ADRBK2, ZNF473, ZDHHC15, GPR34, ATAT1, FAM102A, FCHO2, MYH3, PITRM1</i>        |
| GSK-3 inhibitor                          | 2      | 10     | <i>LPAR4, MAPK1IP1L, RAD23B, NXF3, RNASE2, TNFRSF18, CALCO2, RNASE3, SPON2, C1QTNF3</i> |
| HDAC inhibitor                           | 4      | 25     | <i>MNT, BAZ2B, RNF24, MZF1, ZNF785, ZNF763, RAB3D, PSMC5, CCDC167, CMAHP</i>            |
| Hsp90 inhibitor                          | 2      | 2      | <i>PDLIM1, SEZ6L</i>                                                                    |
| Immunomodulation,<br>anti-inflammatory   | 1      | 4      | <i>DVL2, PEMT, DNAL4, SESN1</i>                                                         |
| Kinase inhibitor                         | 8      | 11     | <i>FLT3, ADRBK2, GPR34, FAM102A, FCHO2, PITRM1, SRSF3, C15orf48, SOCS2, CLEC5A</i>      |
| Met inhibitor                            | 1      | 5      | <i>HSF5, ELAVL1, STOML2, DBF4, HHATL</i>                                                |
| Microtubule inhibitor                    | 3      | 2      | <i>LILRA5, IL10</i>                                                                     |
| mTOR inhibitor                           | 5      | 1      | <i>PKD1</i>                                                                             |
| NFkB inhibitor                           | 2      | 10     | <i>ARHGGEF9, BEX2, C1orf54, AIM1, YY1AP1, NDNL2, C9orf85, GGA2, PMP22, RGS3</i>         |

| Drug Class            | #Drugs | #Genes | Top 10 Genes |
|-----------------------|--------|--------|--------------|
| Pim Kinase inhibitor  | 1      | 1      | <i>SRSF5</i> |
| PKC inhibitor         | 1      | 1      | <i>ANPEP</i> |
| VEGFR1 or 2 inhibitor | 2      | 1      | <i>ACAP2</i> |

1  
2

3 **Supplementary Table 3: Whether each of the 8 expression markers identified by MERGE (rows)**  
4 **would have been identified by the alternative methods in Fig. 3 and 4a (columns). A checkmark means**  
5 **the marker in the corresponding row was identified by the method in the corresponding column. The**  
6 **rows of heat maps in Fig. 6 show the entire list of genes identified by each method.**

| Gene            | ElasticNet | Multi-task learning | Pearson's P-value | Spearman P-value |
|-----------------|------------|---------------------|-------------------|------------------|
| <i>SMARCA4</i>  |            |                     |                   |                  |
| <i>CASP8AP2</i> | ✓          |                     |                   |                  |
| <i>L2HGDH</i>   | ✓          | ✓                   | ✓                 | ✓                |
| <i>FLT3</i>     |            |                     |                   |                  |
| <i>MNT</i>      |            |                     |                   |                  |
| <i>BAZ2B</i>    |            |                     |                   |                  |
| <i>MZF1</i>     |            |                     |                   |                  |
| <i>BEX2</i>     | ✓          |                     |                   |                  |

7

8 **Supplementary Table 4: IC50 and AUC values in the KG1, transfected KG1, U937 and transfected U937**  
9 **cell lines.**

|                                |            |              |             |               |
|--------------------------------|------------|--------------|-------------|---------------|
| <b>AUC (24 hr)</b>             | <b>KG1</b> | <b>t-KG1</b> | <b>U937</b> | <b>t-U937</b> |
| Etoposide                      | 594.318    | 575.157      | 583.107     | 575.956       |
| Mitoxantrone                   | 479.329    | 457.108      | 466.419     | 453.636       |
| <b>AUC (48 hr)</b>             | <b>KG1</b> | <b>t-KG1</b> | <b>U937</b> | <b>t-U937</b> |
| Etoposide                      | 603.722    | 503.202      | 463.981     | 464.517       |
| Mitoxantrone                   | 417.081    | 358.726      | 312.344     | 308.787       |
| <b>AUC (72 hr)</b>             | <b>KG1</b> | <b>t-KG1</b> | <b>U937</b> | <b>t-U937</b> |
| Etoposide                      | 602.589    | 462          | 446.642     | 429.982       |
| Mitoxantrone                   | 427.033    | 306.129      | 293.408     | 292.742       |
| <b>IC<sub>50</sub> (24 hr)</b> | <b>KG1</b> | <b>t-KG1</b> | <b>U937</b> | <b>t-U937</b> |
| Etoposide                      | -5.252     | -5.384       | -5          | -5.09         |
| Mitoxantrone                   | -6.95      | -7.034       | -6.782      | -6.932        |
| <b>IC<sub>50</sub> (48 hr)</b> | <b>KG1</b> | <b>t-KG1</b> | <b>U937</b> | <b>t-U937</b> |
| Etoposide                      | -5.318     | -5.948       | -6.374      | -6.38         |
| Mitoxantrone                   | -7.052     | -7.496       | -8.018      | -8.03         |
| <b>IC<sub>50</sub> (72 hr)</b> | <b>KG1</b> | <b>t-KG1</b> | <b>U937</b> | <b>t-U937</b> |
| Etoposide                      | -5.354     | -6.308       | -6.548      | -6.71         |
| Mitoxantrone                   | -7.088     | -8           | -8.102      | -8.108        |

## 1 Supplementary References

- 2 1. Trapnell, C. *et al.* Transcript assembly and quantification by RNA-Seq reveals unannotated  
3 transcripts and isoform switching during cell differentiation. *Nat. Biotechnol.* **28**, 511–515 (2010).
- 4 2. Barretina, J. *et al.* The Cancer Cell Line Encyclopedia enables predictive modelling of anticancer  
5 drug sensitivity. *Nature* **483**, 603–7 (2012).
- 6 3. Johnson, W. E., Li, C. & Rabinovic, A. Adjusting batch effects in microarray expression data  
7 using empirical Bayes methods. *Biostatistics* **8**, 118–127 (2007).
- 8 4. Döhner, H. *et al.* Diagnosis and management of acute myeloid leukemia in adults:  
9 Recommendations from an international expert panel, on behalf of the European LeukemiaNet.  
10 *Blood* **115**, 453–474 (2010).
- 11 5. Hande, K. R., Stein, R. S., McDonough, D. A., Greco, F. A. & Wolff, S. N. Effects of high-dose  
12 cytarabine. *Clin. Pharmacol. Ther.* **31**, 669–674 (1982).
- 13 6. The Cancer Genome Atlas Research Network. Genomic and Epigenomic Landscapes of Adult De  
14 Novo Acute Myeloid Leukemia — NEJM. *N. Engl. J. Med.* **368**, 2059–2074 (2013).
- 15 7. Gentles, A. J., Plevritis, S. K., Majeti, R. & Alizadeh, A. A. Association of a leukemic stem cell  
16 gene expression signature with clinical outcomes in acute myeloid leukemia. *JAMA* **304**, 2706–15  
17 (2010).
- 18 8. Logsdon, B. A. *et al.* Sparse expression bases in cancer reveal tumor drivers. *Nucleic Acids Res.* **43**,  
19 1332–1344 (2015).
- 20 9. Moarii, M., Boeva, V., Vert, J.-P. & Reyal, F. Changes in correlation between promoter  
21 methylation and gene expression in cancer. *BMC Genomics* **16**, 873 (2015).
- 22 10. Tibshirani, R. Regression Selection and Shrinkage via the Lasso. *J. R. Stat. Soc. B* **58**, 267–288  
23 (1994).
- 24 11. Tibshirani, R. The lasso method for variable selection in the cox model. *Stat. Med.* **16**, 385–395  
25 (1997).
- 26 12. Benjamini, Y. & Hochberg, Y. Controlling the false discovery rate: a practical and powerful  
27 approach to multiple testing. *J. R. Stat. Soc. B* **57**, 289–300 (1995).
- 28 13. Koller, D. & Friedman, N. *Probabilistic Graphical Models: Principles and Techniques*. (The MIT Press,  
29 2009).
- 30 14. Hildreth, C. A Quadratic Programming Procedure. *Nav. Res. Logist. Q.* **4**, 79–85 (1957).
- 31 15. Warga, J. Minimizing Certain Convex Functions. *SIAM J. Appl. Math.* **11**, 588–93 (1963).
- 32 16. Tseng, P. Convergence of a block coordinate descent method for nondifferentiable minimization.  
33 *J. Optim. Theory Appl.* **109**, 475–494 (2001).
- 34 17. Friedman, J., Hastie, T. & Tibshirani, R. Regularization Paths for Generalized Linear Models via

1           Coordinate Descent. *J. Stat. Softw.* **33**, 1–22 (2010).

2   18.   Yuan, H., Paskov, I., Paskov, H., González, A. J. & Leslie, C. S. Multitask learning improves  
3       prediction of cancer drug sensitivity. *Sci. Rep.* **6**, 31619 (2016).

4   19.   Pong, T. K., Tseng, P., Ji, S. & Ye, J. Trace Norm Regularization: Reformulations, Algorithms, and  
5       Multi-Task Learning. *SIAM J. Optim.* **20**, 3465–3489 (2010).

6   20.   Costello, J. C. *et al.* A community effort to assess and improve drug sensitivity prediction  
7       algorithms. *Nat. Biotechnol.* **32**, 1–103 (2014).

8
